1 **Genomic prediction informed by biological processes expands our understanding of the**  
2 **genetic architecture underlying free amino acid traits in dry *Arabidopsis* seeds**

3

4 **Short title:** Biological pathways inform prediction of free amino acids in seeds

5

6 Sarah D. Turner-Hissong<sup>1</sup>, Kevin A. Bird<sup>1</sup>, Alexander E. Lipka<sup>2</sup>, Elizabeth G. King<sup>1</sup>, Timothy M.  
7 Beissinger<sup>3,4</sup>, Ruthie Angelovici<sup>1\*</sup>

8

9 <sup>1</sup> Division of Biological Sciences, University of Missouri, Columbia, MO, USA

10

11 <sup>2</sup> Department of Crop Sciences, University of Illinois at Urbana-Champaign, IL, USA

12

13 <sup>3</sup> Division of Plant Breeding Methodology, Department of Crop Science, Georg-August-  
14 Universtät, Göttingen, Germany

15

16 <sup>4</sup> Center for Integrated Breeding Research, Georg-August-Universtät, Göttingen, Germany

17

18

19 **\* Corresponding author:**

20 **E-mail:** [angelovicir@missouri.edu](mailto:angelovicir@missouri.edu) (RA)

## 21 **Abstract**

22 Amino acids are a critical component of plant growth and development, as well as human  
23 and animal nutrition. A better understanding of the genetic architecture of amino acid traits,  
24 especially in seeds, will enable researchers to use this information for plant breeding and biological  
25 discovery. Despite a collection of successfully mapped genes, a fundamental understanding of the  
26 types of genes and biological processes underlying amino acid related traits in seeds remains  
27 unresolved. In this study, we used genomic prediction with SNPs partitioned by metabolic  
28 pathways to quantify the contribution of primary, specialized, and protein metabolic processes to  
29 free amino acid (FAA) homeostasis in dry *Arabidopsis* seeds. First, we demonstrate that standard  
30 genomic prediction is effective for FAA traits. Next, we show that genomic partitioning by  
31 metabolic pathway annotations explains significant genetic variation and improves prediction  
32 accuracy for many FAA traits, including many trait-pathway associations that have not been  
33 previously reported. Surprisingly, SNPs related to amino acid and primary metabolism had limited  
34 effects on prediction accuracy for most FAA traits, with the largest effects observed for branched  
35 chain amino acids (BCAAs). In contrast, SNPs related to secondary and protein metabolism had a  
36 more extensive effect on prediction accuracy. The use of a genomic partitioning approach also  
37 revealed specific patterns across biochemical families, in which protein related annotations were  
38 the only category influencing serine-derived FAAs and primary and specialized metabolic  
39 pathways were the only categories contributing to aromatic FAAs. Based on these findings, we  
40 used pathway-guided association analysis to identify novel SNP associations for traits related to  
41 methionine, threonine, histidine, arginine, glycine, phenylalanine, and BCAAs. Taken together,  
42 these findings provide evidence that genomic partitioning is a viable strategy to uncover the  
43 complexity of FAA homeostasis and to identify candidate genes for future functional validation.

## 44 **Author summary**

45 Plant growth, development, and nutritional quality depends upon the regulation of amino  
46 acid homeostasis, especially in seeds. However, our understanding of the underlying genetics  
47 influencing amino acid content and composition remains limited, with only a few candidate genes  
48 and quantitative trait loci identified to date. As an alternative approach, we implemented  
49 multikernel genomic prediction to test whether or not genomic regions related to specific metabolic  
50 pathways contribute to free amino acid (FAA) variation in seeds of the model plant *Arabidopsis*  
51 *thaliana*. Importantly, this method successfully identifies pathways containing known variants for  
52 FAA traits, in addition to identifying new pathway associations. For several traits, the  
53 incorporation of prior biological knowledge provided substantial improvements in prediction  
54 accuracy. We present this approach as a promising framework to guide hypothesis testing and  
55 narrow the search space for candidate genes.

56

## 57 **Introduction**

58 Amino acids play a central role in plant growth and development. In addition to serving as  
59 the building blocks for proteins, amino acids are involved in essential biological processes that  
60 include nitrogen assimilation, specialized metabolism, osmotic adjustment, alternative energy, and  
61 signaling [1–5]. The homeostasis for absolute levels and relative composition of the free amino  
62 acid (FAA) pool is complex, depending on various factors such as allosteric regulation, feedback  
63 loops of key synthetic metabolic enzymes in amino acid metabolic pathways, and the rate of amino  
64 acid degradation [6–10]. In addition, FAA homeostasis can be influenced by protein metabolism.  
65 For example, the consistently observed significant increase in FAAs under many abiotic stresses  
66 is suggested to result from autophagy and protein turnover [7,8,11–13]. Specific FAAs, such as  
67 proline, may serve as either an osmoprotectant under stress or an energy source during  
68 development, with their elevation resulting mostly from active synthesis rather than protein  
69 degradation [14,15]. Studies have also demonstrated that the composition of the FAA pool is  
70 affected when either primary or specialized metabolism is altered. For example, perturbation of  
71 the glucosinolate pathway in *Arabidopsis* plants caused a significant elevation of multiple FAAs  
72 [16], while alteration of the interconversion of pyruvate and malate in tomato fruits caused

73 reduction in aspartate family related FAAs [17]. Therefore, FAA homeostasis is most likely  
74 determined by orchestration of multiple processes, but it remains challenging to pinpoint the main  
75 processes that are associated with homeostasis at various developmental stages.

76 Dry seeds, despite their metabolically dormant state, maintain a tightly regulated FAA  
77 pool, which contributes to proper desiccation, longevity, germination, and seed vigor [5,18]. This  
78 pool comprises 1-10% of total seed amino acid content in maize [6,19] and ~7% in *Arabidopsis*  
79 *thaliana* [6,20]. Fait et al. [21] showed that in *Arabidopsis*, several FAAs are actively synthesized  
80 during late seed desiccation to provide the necessary precursors for early germination. Other  
81 studies further demonstrated that the natural variation of histidine and branched-chain amino acid  
82 (BCAA) levels in dry *Arabidopsis* seeds are associated with amino acid catabolism or transport  
83 [22,23]. Protein metabolism has also been implicated in determining the homeostasis of FAAs in  
84 dry seeds. For instance, the *opaque2* null mutant, which results in reduction of the most abundant  
85 seed storage proteins in maize, had significant elevation of many FAAs despite an unchanged  
86 composition of protein-bound amino acids [24,25]. The goal of engineering mutants like *opaque2*  
87 is to increase accumulation of essential amino acids that are deficient in crop seeds, such as lysine.  
88 However, these mutations have negative effects on key agronomic traits such as disease resistance,  
89 germination rate, and seedling vigor [26], suggesting a tight integration of AA metabolism with  
90 both primary and specialized metabolism.

91 Like many other primary metabolites in dry seeds, FAAs are complex traits with extensive  
92 variability and high heritability across natural populations. Several genome-wide association  
93 studies (GWAS) have been performed on FAAs, which resulted in the successful identification of  
94 candidate loci for amino acid traits, both independently [27] and in conjunction with QTL studies  
95 [22,23]. However, the number and effect size of loci detected so far explained only a fraction of  
96 the observed phenotypic variation for these traits, with some traits proving harder to dissect than  
97 others. For example, [22,23] found the strongest associations for traits related to histidine and  
98 BCAAs, but weak signals for most other FAA traits. In addition, GWAS has limited power to  
99 reliably identify variants that are rare and/or of small effect [28]. In an attempt to uncover more of  
100 the genetic basis for FAA composition, subsequent investigations used integrated analyses that  
101 combined GWAS, linkage mapping, and metabolic correlation networks to identify new candidate  
102 loci related to FAA levels in both seeds and leaves of *Arabidopsis* [23,29]. Several metabolic

103 studies have also integrated prior information on biological relationships to specify metabolic  
104 ratios, which can uncover novel or more significant associations compared to absolute levels of  
105 metabolites [22,23,30–36].

106 The consistent finding that amino acid traits frequently have several associated loci,  
107 coupled with the difficulty of GWAS to explain a large proportion of the genetic variation for these  
108 traits, suggests that amino acid traits may have a highly polygenic architecture with many loci of  
109 small effect. While linkage mapping and GWAS are typically underpowered to map loci  
110 contributing to polygenic traits, genomic prediction methods excel at providing information when  
111 traits are highly complex [37–39]. Genomic prediction allows researchers to predict an individual's  
112 breeding value, or the additive component of their genetic variation, based only on genotypic data  
113 [37,40]. The efficacy of genomic prediction results from its simultaneous use of all genotyped  
114 markers and indifference to the statistical significance of individual markers, in contrast to  
115 analyzing markers one-at-a-time for significance as is done for linkage mapping and GWAS [40].  
116 This allows the inclusion of information from all loci to make predictions, instead of basing  
117 conclusions only on loci that achieve genome-wide significance, and therefore captures more of  
118 the additive genetic variance.

119 Genomic best linear unbiased prediction (GBLUP) [37], which assumes that all SNPs share  
120 a common effect size distribution, is one of the most widely used methods for prediction of  
121 complex traits. Extensions of the GBLUP model, such as MultiBLUP [41], genomic feature BLUP  
122 (GFBLUP) [42–45], and the Bayesian method BayesRC [46] incorporate genomic partitions as  
123 multiple random effects, allowing effect size weightings to vary across different categories of  
124 variants. These partitions can be derived from prior biological information, such as physical  
125 position, genic/nongenic regions, pathway annotations, and gene ontologies. Models that  
126 incorporate genomic partitioning have allowed researchers to determine the influence of genomic  
127 features (e.g. chromosome segments, exons) and/or biological pathways on variance explained for  
128 complex traits in humans [47,48], cattle [42,45,49], Duroc pigs [44], fruit flies [42,50], and maize  
129 [51]. Notably, when genomic partitions are enriched for previously identified candidate genes,  
130 these models demonstrably improve prediction accuracy [42,44–46,49]. Evidence also suggests  
131 that, although many genetic markers may contribute to the overall genetic variation, many of these  
132 markers are preferentially located in genes that are connected to a biological pathway(s) [52].

133 In this study, we used the framework of genomic partitioning, coupled with prior  
134 knowledge and annotations of metabolic pathways, to evaluate which biological processes and  
135 regions of the genome are disproportionately influencing FAA content and composition in seeds  
136 of a diverse *Arabidopsis* panel. The primary goal was to identify the relative importance of  
137 previously implicated metabolic pathways (i.e. amino acid, primary, specialized, and protein  
138 metabolism) in relation to FAA content and composition in dry seeds. To this end, we demonstrate  
139 that specific pathways explain more variation than expected by chance for several FAA traits and  
140 improve prediction accuracy when using genomic partitioning. Findings suggest that specialized  
141 and protein metabolism are associated with many FAAs, while amino acid metabolism is  
142 associated with a very limited number. We then used these results to apply pathway-level  
143 association mapping (e.g. [34]), which uncovered additional novel loci associated with FAA levels  
144 in *Arabidopsis* seeds. By identifying genes in metabolic pathways that explain significant genetic  
145 variation and improve prediction accuracy, we can form a more comprehensive understanding of  
146 which pathways underlie FAA homeostasis in seeds. When compared to previous GWAS results,  
147 this approach adds additional information on the orchestrated regulation of FAAs in seeds, which  
148 will help expand our understanding of complex metabolic networks in plants.

149

150

## 151 **Results**

152

### 153 **Genomic prediction is most effective for absolute levels of free amino acids**

154 Using the GBLUP model, we observed low to moderate prediction accuracy for the amino  
155 acid traits measured (see S1 Table for trait descriptions). Of the 65 traits measured, 26 had  
156 prediction accuracy  $> 0.3$  (Fig 1, Table 1). In general, prediction was effective for a greater number  
157 of absolute level FAA traits (68%  $> 0.3$ ) compared to relative levels (29%) and family-derived  
158 ratios (17%). The aromatic family composite trait (ShikFam, combined absolute levels of  
159 phenylalanine, tryptophan, and tyrosine) had the highest prediction accuracy ( $r = 0.43$ ), while the  
160 absolute level of threonine had the lowest prediction accuracy ( $r = 0.11$ ) (Table 1).

161

**Table 1. Genomic prediction results for amino acid traits using a GBLUP model.**

| Trait type    | Metabolic family | Trait     | accuracy |       | reliability |       | bias      |          | MSE      |
|---------------|------------------|-----------|----------|-------|-------------|-------|-----------|----------|----------|
|               |                  |           | mean     | SE    | mean        | SE    | intercept | slope    |          |
| absolute      | aspartate        | asp       | 0.286    | 0.024 | 0.115       | 0.014 | 4.64E-04  | 0.936    | 3.57E-05 |
|               |                  | met       | 0.321    | 0.024 | 0.214       | 0.025 | 5.75E-06  | 1.051    | 1.14E-05 |
|               |                  | thr       | 0.105    | 0.023 | 0.079       | 0.014 | -1.23E-05 | 0.756    | 5.56E-06 |
|               |                  | AspFam    | 0.235    | 0.023 | 0.123       | 0.017 | 2.64E-04  | 1.042    | 2.28E-05 |
|               | BCAA_pyruvate    | ala       | 0.299    | 0.024 | 0.177       | 0.023 | 5.33E-04  | 1.119    | 6.69E-04 |
|               |                  | ile       | 0.326    | 0.022 | 0.182       | 0.022 | 2.38E-04  | 1.046    | 1.19E-04 |
|               |                  | leu       | 0.342    | 0.022 | 0.185       | 0.019 | 7.55E-04  | 1.035    | 2.13E-04 |
|               |                  | lys       | 0.246    | 0.026 | 0.128       | 0.018 | -1.74E-03 | 0.921    | 1.58E-03 |
|               |                  | val       | 0.409    | 0.020 | 0.187       | 0.017 | 5.06E-04  | 1.027    | 1.18E-04 |
|               |                  | BCAA      | 0.392    | 0.020 | 0.199       | 0.019 | 5.40E-04  | 1.042    | 1.65E-04 |
|               |                  | PyrFam    | 0.361    | 0.023 | 0.208       | 0.022 | 4.02E-04  | 1.108    | 1.87E-04 |
|               | glutamate        | arg       | 0.228    | 0.023 | 0.145       | 0.020 | -1.75E-04 | 0.923    | 2.85E-05 |
|               |                  | gln       | 0.193    | 0.024 | 0.149       | 0.024 | 5.11E-04  | 1.032    | 2.47E-03 |
|               |                  | glu       | 0.339    | 0.023 | 0.182       | 0.019 | 2.95E-05  | 0.990    | 1.10E-06 |
|               |                  | his       | 0.356    | 0.021 | 0.148       | 0.014 | 6.14E-03  | 0.880    | 6.57E-03 |
|               |                  | pro       | 0.372    | 0.021 | 0.194       | 0.019 | -4.68E-04 | 1.010    | 1.02E-03 |
|               |                  | GluFam    | 0.322    | 0.024 | 0.133       | 0.014 | -5.26E-06 | 0.916    | 1.06E-05 |
|               | serine           | gly       | 0.363    | 0.023 | 0.252       | 0.027 | -6.57E-05 | 1.072    | 9.49E-05 |
|               |                  | ser       | 0.225    | 0.022 | 0.147       | 0.019 | 6.55E-04  | 1.078    | 7.65E-04 |
|               |                  | SerFam    | 0.323    | 0.023 | 0.192       | 0.020 | 9.76E-05  | 1.030    | 6.76E-04 |
|               | aromatic         | phe       | 0.307    | 0.022 | 0.172       | 0.021 | 2.73E-05  | 1.084    | 1.84E-06 |
|               |                  | trp       | 0.348    | 0.019 | 0.223       | 0.022 | -1.73E-04 | 1.019    | 1.23E-05 |
|               |                  | tyr       | 0.344    | 0.026 | 0.202       | 0.024 | -2.49E-04 | 1.046    | 8.96E-06 |
|               |                  | ShikFam   | 0.431    | 0.018 | 0.245       | 0.018 | 6.43E-05  | 1.023    | 1.09E-06 |
|               |                  | Total     | 0.395    | 0.024 | 0.183       | 0.017 | 5.43E-05  | 1.015    | 5.11E-06 |
|               | relative         | aspartate | asp_t    | 0.392 | 0.023       | 0.178 | 0.017     | 1.51E-02 | 0.933    |
| met_t         |                  |           | 0.328    | 0.022 | 0.181       | 0.018 | -8.14E-05 | 1.021    | 2.99E-05 |
| BCAA_pyruvate |                  | ala_t     | 0.205    | 0.025 | 0.184       | 0.030 | 2.98E-05  | 1.239    | 1.97E-05 |
|               |                  | ile_t     | 0.233    | 0.022 | 0.137       | 0.021 | -1.33E-04 | 1.085    | 3.72E-05 |
|               |                  | leu_t     | 0.263    | 0.023 | 0.137       | 0.018 | 9.09E-05  | 1.093    | 2.64E-05 |
|               |                  | lys_t     | 0.224    | 0.023 | 0.159       | 0.020 | -2.12E-04 | 1.112    | 3.35E-05 |
|               |                  | val_t     | 0.306    | 0.024 | 0.242       | 0.028 | -1.96E-04 | 1.106    | 9.94E-06 |
| glutamate     |                  | arg_t     | 0.193    | 0.025 | 0.154       | 0.023 | -1.17E-04 | 1.056    | 2.07E-05 |
|               |                  | gln_t     | 0.108    | 0.023 | 0.236       | 0.039 | 1.14E-04  | 1.322    | 1.77E-04 |
|               |                  | glu_t     | 0.260    | 0.021 | 0.179       | 0.021 | 2.00E-02  | 1.008    | 2.78E-01 |
|               |                  | his_t     | 0.262    | 0.026 | 0.160       | 0.019 | 1.22E-03  | 1.076    | 3.24E-04 |
|               |                  | pro_t     | 0.342    | 0.020 | 0.172       | 0.016 | 4.54E-05  | 1.022    | 4.72E-05 |
| serine        |                  | gly_t     | 0.276    | 0.025 | 0.290       | 0.038 | -8.77E-04 | 1.127    | 1.37E-03 |
|               |                  | ser_t     | 0.156    | 0.023 | 0.143       | 0.024 | 4.44E-04  | 1.452    | 9.95E-05 |
| aromatic      |                  | phe_t     | 0.341    | 0.017 | 0.174       | 0.016 | -3.19E-04 | 1.047    | 2.49E-04 |
|               |                  | trp_t     | 0.221    | 0.023 | 0.145       | 0.020 | -2.27E-04 | 0.940    | 2.62E-05 |
|               |                  | tyr_t     | 0.151    | 0.027 | 0.169       | 0.023 | -2.51E-04 | 1.112    | 3.68E-05 |

| Trait type  | Metabolic family | Trait       | accuracy |       | reliability |           | bias      |          | MSE      |
|-------------|------------------|-------------|----------|-------|-------------|-----------|-----------|----------|----------|
|             |                  |             | mean     | SE    | mean        | SE        | intercept | slope    |          |
| family      | aspartate        | asp_AspFam  | 0.159    | 0.025 | 0.159       | 0.026     | -2.32E-04 | 1.309    | 1.27E-04 |
|             |                  | ile_AspFam  | 0.339    | 0.022 | 0.218       | 0.022     | -6.30E-05 | 1.197    | 2.05E-05 |
|             |                  | lys_AspFam  | 0.179    | 0.024 | 0.125       | 0.019     | -9.62E-05 | 0.933    | 4.47E-06 |
|             |                  | met_AspFam  | 0.296    | 0.023 | 0.219       | 0.025     | 7.92E-05  | 1.060    | 1.62E-05 |
|             |                  | thr_AspFam  | 0.211    | 0.023 | 0.132       | 0.017     | -4.73E-05 | 1.049    | 1.11E-06 |
|             |                  | AspFam_Asp  | 0.235    | 0.023 | 0.123       | 0.017     | 2.64E-04  | 1.042    | 2.28E-05 |
|             | BCAA_pyruvate    | ala_PyrFam  | 0.272    | 0.019 | 0.091       | 0.010     | 1.37E-04  | 0.905    | 5.62E-05 |
|             |                  | ile_BCAA    | 0.169    | 0.020 | 0.065       | 0.010     | 7.60E-05  | 0.914    | 9.26E-06 |
|             |                  | leu_BCAA    | 0.196    | 0.020 | 0.107       | 0.017     | 8.24E-05  | 1.076    | 4.84E-06 |
|             |                  | leu_PyrFam  | 0.274    | 0.020 | 0.106       | 0.013     | -3.02E-05 | 0.975    | 5.50E-06 |
|             |                  | val_BCAA    | 0.172    | 0.019 | 0.066       | 0.010     | -8.61E-05 | 0.848    | 1.85E-05 |
|             |                  | val_PyrFam  | 0.227    | 0.019 | 0.070       | 0.009     | 7.23E-05  | 0.858    | 4.20E-06 |
|             | glutamate        | arg_GluFam  | 0.134    | 0.027 | 0.174       | 0.032     | -1.15E-04 | 1.243    | 3.93E-06 |
|             |                  | gln_GluFam  | 0.135    | 0.022 | 0.197       | 0.030     | 3.23E-03  | 1.076    | 2.38E-02 |
|             |                  | glu_GluFam  | 0.229    | 0.028 | 0.184       | 0.025     | 1.47E-04  | 0.992    | 3.74E-05 |
|             |                  | GluFam_glu  | 0.270    | 0.027 | 0.144       | 0.020     | 8.87E-04  | 0.881    | 1.51E-04 |
|             |                  | his_GluFam  | 0.195    | 0.023 | 0.127       | 0.019     | 5.48E-02  | 1.012    | 4.98E+00 |
|             |                  | pro_GluFam  | 0.349    | 0.025 | 0.209       | 0.019     | 1.51E-04  | 1.004    | 1.68E-05 |
|             | serine           | gly_SerFam  | 0.314    | 0.024 | 0.283       | 0.036     | 2.54E-05  | 1.172    | 2.47E-05 |
|             |                  | ser_SerFam  | 0.313    | 0.024 | 0.286       | 0.037     | -2.44E-05 | 1.179    | 1.32E-05 |
|             | aromatic         | phe_ShikFam | 0.223    | 0.029 | 0.188       | 0.027     | 2.19E-04  | 1.097    | 1.38E-05 |
| trp_ShikFam |                  | 0.217       | 0.024    | 0.162 | 0.023       | -8.03E-05 | 1.028     | 5.66E-06 |          |
| tyr_ShikFam |                  | 0.168       | 0.024    | 0.114 | 0.019       | -5.18E-05 | 0.945     | 1.52E-06 |          |

*SE*, standard error; *MSE*, mean squared error.



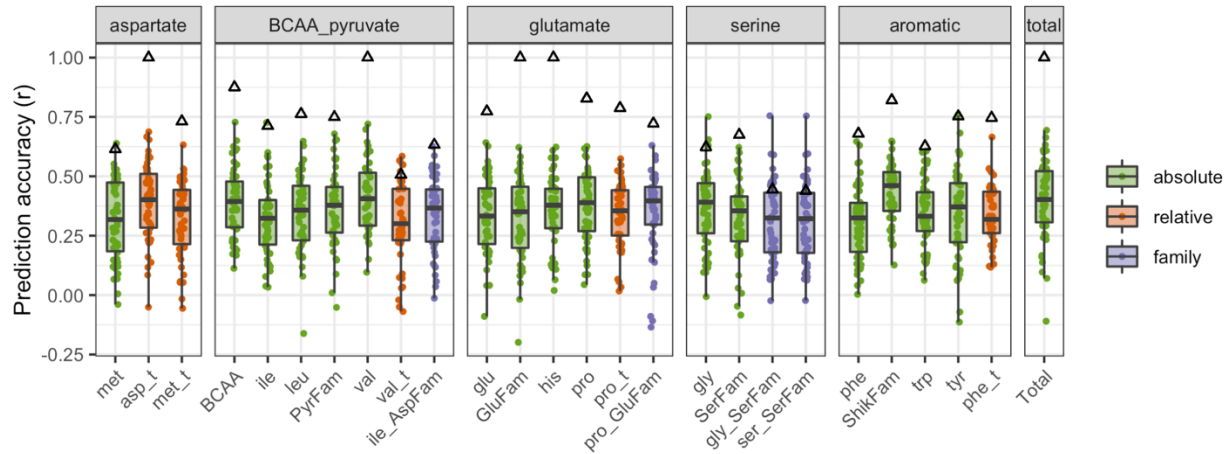

162 **Fig 1. Genomic prediction performed well for a higher proportion of absolute traits**  
163 **compared to relative and family-based ratio traits.**

164 Boxplots show free amino acid traits with prediction accuracy ( $r > 0.3$ ) based on genomic best  
165 linear unbiased prediction (GBLUP). For absolute traits, 68% had  $r > 0.3$  compared to relative  
166 traits (29%) and family-based ratio traits (17%). Black triangles indicate the genomic heritability  
167 for each trait. Each point represents an individual cross-validation.

168

169 **Annotations of biological pathways explain variation and improve prediction accuracy for**  
170 **free amino acid traits in seeds**

171 The pathway annotations listed in Table 2 were used to subset SNPs and spanned amino  
172 acid, primary, specialized, and protein metabolism. When partitioning these pathways in the  
173 MultiBLUP model, 44 trait-pathway combinations were flagged as putatively related based on  
174 comparison to a null distribution (Fig 2, Table 3). Results for the null distribution of each trait,  
175 including how many random gene groups passed filtering criteria, are reported in S2 Table and S2  
176 Fig. The observation that specific pathways improve model fit based on likelihood ratio (LR) and  
177 explain a significant proportion of genomic heritability suggests that these pathway annotations  
178 may have biological relevance for FAA traits.

179 **Table 2. Summary of selected biological pathways.**

| <b>Pathway</b>                         | <b>Number of genes<sup>a</sup></b> | <b>Number of SNPs<sup>a</sup></b> | <b>MapMan BINCODE</b> |
|----------------------------------------|------------------------------------|-----------------------------------|-----------------------|
| <i>Amino Acid Metabolism</i>           |                                    |                                   |                       |
| amino acid synthesis                   | 376                                | 2084                              | 13.1                  |
| amino acid degradation                 | 160                                | 1094                              | 13.2                  |
| amino acid transport                   | 144                                | 939                               | 34.3                  |
| <i>Primary Metabolism</i>              |                                    |                                   |                       |
| glycolysis                             | 148                                | 858                               | 4                     |
| TCA cycle                              | 167                                | 926                               | 8                     |
| ATP synthesis (alternative oxidase)    | 10                                 | 66                                | 9.4                   |
| <i>Specialized Metabolism</i>          |                                    |                                   |                       |
| isoprenoids                            | 269                                | 1788                              | 16.1                  |
| phenylpropanoids                       | 161                                | 845                               | 16.2                  |
| nitrogen containing                    | 39                                 | 229                               | 16.4                  |
| sulfur containing                      | 113                                | 733                               | 16.5                  |
| flavonoids                             | 171                                | 1062                              | 16.8                  |
| <i>Protein Metabolism</i>              |                                    |                                   |                       |
| amino acid activation                  | 203                                | 1231                              | 29.1                  |
| protein synthesis                      | 1383                               | 7290                              | 29.2                  |
| protein targeting                      | 624                                | 3689                              | 29.3                  |
| protein posttranslational modification | 1407                               | 8794                              | 29.4                  |
| protein degradation                    | 996                                | 6405                              | 29.5                  |
| ubiquitin                              | 2691                               | 16000                             | 29.5.11               |
| protein folding                        | 138                                | 814                               | 29.6                  |
| protein glycosylation                  | 87                                 | 459                               | 29.7                  |
| protein assembly                       | 44                                 | 312                               | 29.8                  |

<sup>a</sup>Includes a 2.5 kb buffer before and after the start/stop position of each gene.

180 A few patterns were noticeable when looking at absolute levels of FAAs (Fig 2). Traits in  
181 the aspartate and glutamate families showed a high proportion of genomic heritability explained  
182 for pathways related to specialized and protein metabolism. One example is the pathway for sulfur  
183 containing compounds and absolute levels of methionine, which is a precursor for aliphatic  
184 glucosinolates. The only relationship observed for absolute levels in the pyruvate/BCAA group  
185 was with amino acid synthesis. Similarly, three traits in the serine family had a significant  
186 proportion of genomic heritability explained for pathways related to protein metabolism, while  
187 three traits in the aromatic family stood out for specialized metabolism.

188 When looking at relative ratios of FAA traits (Fig 2), a high proportion of genomic  
189 heritability was explained for four traits in the glutamate family and pathways across amino acid  
190 metabolism, primary metabolism, specialized metabolism, and protein metabolism. A similar  
191 relationship was observed for traits in the pyruvate/BCAA family, with the exception of  
192 specialized metabolism. Traits in the serine and aromatic families again showed significant values  
193 for pathways related to protein and specialized metabolism, respectively. These relationships were  
194 similar for family-based ratios of FAA traits (Fig 2), with the exception that traits in the  
195 pyruvate/BCAA family had associations with specialized metabolism and not with primary  
196 metabolism.

197 For nine trait-pathway combinations, the prediction accuracy for the MultiBLUP model  
198 was over 5% higher than for the GBLUP model with limited effects on bias and MSE (Table 3,  
199 bold). This substantial increase in prediction accuracy was observed for BCAA related traits when  
200 the model included the amino acid degradation (relative levels of isoleucine, Ile\_t, and the family-  
201 based ratio of valine, Val\_BCAA) or isoprenoid pathway information (Val\_BCAA). A similar  
202 increase in prediction accuracy was observed for relative and family-based ratios of glutamine  
203 (Gln\_t and Gln\_GluFam, respectively) when partitioning SNPs related to sulfur containing  
204 specialized metabolites, and for the family-based ratio of tyrosine (Tyr\_ShikFam) for SNPs related  
205 to phenylpropanoids.

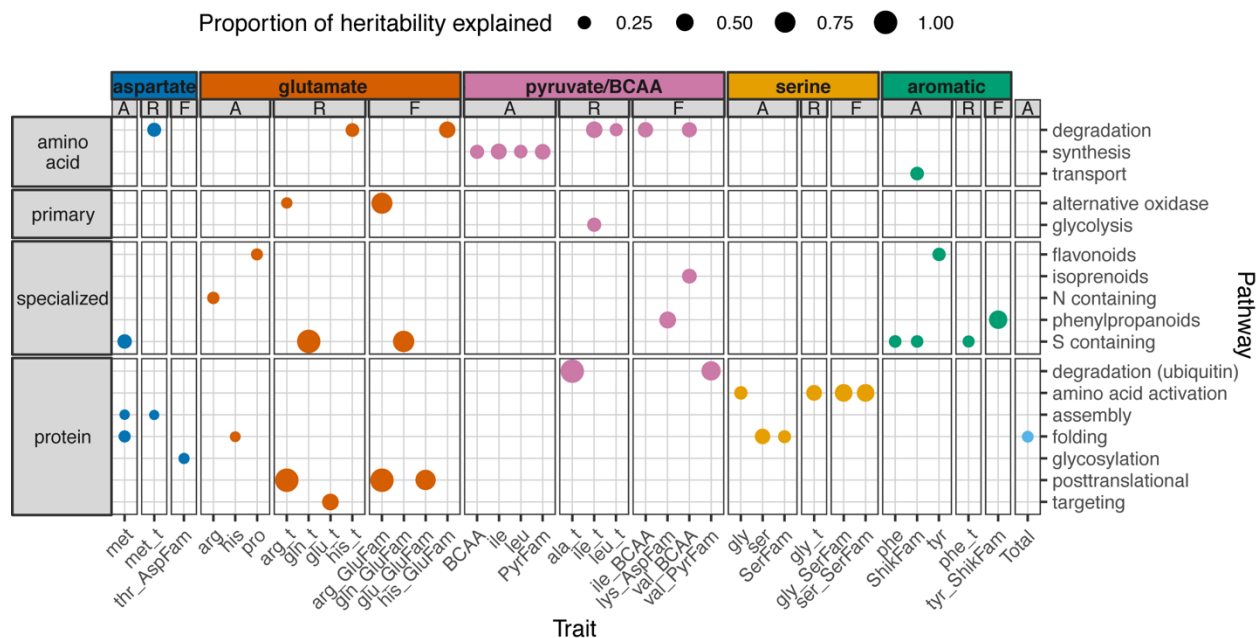

206 **Fig 2. Biological pathways explain significant variation and improve prediction accuracy for**  
 207 **free amino acid traits.**

208 Dots indicate pathways that improved prediction accuracy compared to GBLUP and exceeded the  
 209 95% null thresholds for proportion of heritability explained and likelihood ratio (LR). The  
 210 diameter of each dot is proportional to the amount of genomic variance explained by pathway  
 211 SNPs in the MultiBLUP model. Traits are included on the x-axis and grouped by metabolic family  
 212 (aspartate, glutamate, pyruvate/BCAA, serine, aromatic) and type of measurement (A = absolute,  
 213 R = relative, F = family-based ratio). Pathways are included on the y-axis and separated into amino  
 214 acid, primary, specialized, and protein metabolism categories.

**Table 3. Free amino acid traits and pathway combinations for which MultiBLUP increases accuracy compared to GBLUP.**

|                     | Pathway                 | Trait              | Proportion $h^2$ explained |             | Likelihood ratio           |              |              | $\Delta$ bias      |                 |                 | $\Delta$ MSE    |
|---------------------|-------------------------|--------------------|----------------------------|-------------|----------------------------|--------------|--------------|--------------------|-----------------|-----------------|-----------------|
|                     |                         |                    | 95 percentile <sup>a</sup> | MultiBLUP   | 95 percentile <sup>a</sup> | MultiBLUP    | $\Delta r^b$ | $\Delta r^2/h^2^c$ | intercept       | slope           |                 |
| amino acid          | degradation             | his_t              | 0.19                       | 0.26        | 4.43                       | 5.65         | 0.03         | 0.01               | -3.2E-04        | -4.5E-02        | 2.8E-05         |
|                     | <b>degradation</b>      | <b>ile_t</b>       | <b>0.28</b>                | <b>0.43</b> | <b>4.30</b>                | <b>9.12</b>  | <b>0.07</b>  | <b>0.07</b>        | <b>2.2E-04</b>  | <b>-5.4E-02</b> | <b>4.8E-07</b>  |
|                     | degradation             | leu_t              | 0.22                       | 0.24        | 4.05                       | 5.17         | 0.03         | 0.03               | -4.0E-05        | -4.3E-02        | -2.0E-06        |
|                     | degradation             | met_t              | 0.15                       | 0.28        | 3.30                       | 6.63         | 0.03         | 0.02               | 2.8E-05         | -9.0E-03        | -2.0E-06        |
|                     | <b>degradation</b>      | <b>his_GluFam</b>  | <b>0.22</b>                | <b>0.42</b> | <b>4.70</b>                | <b>8.73</b>  | <b>0.06</b>  | <b>0.03</b>        | <b>5.6E-02</b>  | <b>8.3E-02</b>  | <b>8.7E-01</b>  |
|                     | degradation             | ile_BCAA           | 0.19                       | 0.36        | 4.41                       | 5.98         | 0.04         | 0.03               | -4.8E-05        | 2.3E-02         | 3.0E-07         |
|                     | <b>degradation</b>      | <b>val_BCAA</b>    | <b>0.19</b>                | <b>0.34</b> | <b>3.56</b>                | <b>9.99</b>  | <b>0.07</b>  | <b>0.05</b>        | <b>7.6E-05</b>  | <b>4.2E-02</b>  | <b>-1.1E-06</b> |
|                     | synthesis               | BCAA               | 0.15                       | 0.29        | 4.18                       | 11.58        | 0.03         | 0.03               | 3.2E-04         | -2.6E-02        | -1.2E-05        |
|                     | synthesis               | ile                | 0.24                       | 0.39        | 3.54                       | 7.69         | 0.05         | 0.04               | 1.2E-04         | -4.3E-02        | -9.3E-06        |
|                     | synthesis               | leu                | 0.19                       | 0.26        | 3.25                       | 12.56        | 0.03         | 0.03               | 3.1E-04         | -2.1E-02        | -1.4E-05        |
| synthesis           | PyrFam                  | 0.16               | 0.37                       | 3.43        | 5.17                       | 0.03         | 0.03         | -5.0E-05           | -8.9E-02        | -6.6E-07        |                 |
| transport           | ShikFam                 | 0.10               | 0.27                       | 3.55        | 6.43                       | 0.03         | 0.03         | -4.1E-05           | -7.2E-03        | 2.8E-08         |                 |
| primary             | alternative oxidase     | arg_t              | 0.03                       | 0.16        | 3.95                       | 4.35         | 0.02         | 0.00               | 1.5E-05         | 1.5E-02         | 1.2E-06         |
|                     | alternative oxidase     | arg_GluFam         | 0.14                       | 0.77        | 3.40                       | 9.39         | 0.05         | 0.05               | -2.6E-05        | -6.7E-02        | 3.2E-03         |
|                     | glycolysis              | ile_t              | 0.23                       | 0.29        | 3.78                       | 5.19         | 0.02         | 0.02               | -5.3E-05        | -7.1E-02        | 2.8E-06         |
| specialized         | flavonoids              | pro                | 0.10                       | 0.18        | 2.98                       | 3.46         | 0.02         | 0.02               | -3.2E-04        | -1.1E-03        | -5.8E-05        |
|                     | flavonoids              | tyr                | 0.16                       | 0.25        | 3.75                       | 5.75         | 0.02         | 0.01               | -6.8E-05        | -8.5E-03        | -1.9E-07        |
|                     | <b>isoprenoids</b>      | <b>val_BCAA</b>    | <b>0.23</b>                | <b>0.33</b> | <b>3.56</b>                | <b>6.26</b>  | <b>0.09</b>  | <b>0.05</b>        | <b>7.5E-05</b>  | <b>-1.3E-01</b> | <b>8.8E-07</b>  |
|                     | N containing            | arg                | 0.14                       | 0.20        | 3.07                       | 3.64         | 0.01         | 0.01               | -1.5E-04        | 4.6E-02         | 1.6E-06         |
|                     | phenylpropanoids        | lys_AspFam         | 0.23                       | 0.45        | 3.67                       | 3.95         | 0.03         | 0.03               | -5.8E-05        | 4.9E-02         | 4.3E-08         |
|                     | <b>phenylpropanoids</b> | <b>tyr_ShikFam</b> | <b>0.18</b>                | <b>0.56</b> | <b>4.61</b>                | <b>10.86</b> | <b>0.11</b>  | <b>0.07</b>        | <b>-5.0E-05</b> | <b>-5.6E-03</b> | <b>-2.7E-07</b> |
|                     | S containing            | met                | 0.14                       | 0.30        | 3.58                       | 5.46         | 0.03         | 0.02               | 1.3E-05         | -3.6E-02        | -2.6E-07        |
|                     | S containing            | phe                | 0.14                       | 0.21        | 3.68                       | 4.38         | 0.03         | 0.03               | -1.0E-06        | -6.2E-03        | 7.3E-08         |
|                     | S containing            | ShikFam            | 0.10                       | 0.21        | 3.55                       | 8.18         | 0.02         | 0.02               | -1.3E-05        | -1.0E-02        | -8.0E-11        |
|                     | <b>S containing</b>     | <b>gln_t</b>       | <b>0.58</b>                | <b>1.00</b> | <b>4.56</b>                | <b>5.59</b>  | <b>0.06</b>  | <b>0.13</b>        | <b>1.5E-04</b>  | <b>-2.6E-01</b> | <b>1.1E-05</b>  |
|                     | S containing            | phe_t              | 0.13                       | 0.19        | 3.78                       | 4.60         | 0.02         | 0.02               | 2.1E-04         | -1.9E-02        | 4.7E-06         |
| <b>S containing</b> | <b>gln_GluFam</b>       | <b>0.33</b>        | <b>0.80</b>                | <b>3.44</b> | <b>6.41</b>                | <b>0.06</b>  | <b>0.12</b>  | <b>-2.3E-03</b>    | <b>-5.2E-02</b> | <b>1.5E-03</b>  |                 |

| Pathway   | Trait                        | Proportion h <sup>2</sup> explained |             | Likelihood ratio           |             |                 |                                  | Δbias       |                |                 |                 |
|-----------|------------------------------|-------------------------------------|-------------|----------------------------|-------------|-----------------|----------------------------------|-------------|----------------|-----------------|-----------------|
|           |                              | 95 percentile <sup>a</sup>          | MultiBLUP   | 95 percentile <sup>a</sup> | MultiBLUP   | Δr <sup>b</sup> | Δr <sup>2</sup> /h <sup>2c</sup> | intercept   | slope          | ΔMSE            |                 |
| protein   | degradation (ubiquitin)      | ala_t                               | 1.00        | 1.00                       | 4.19        | 5.57            | 0.04                             | 0.05        | 1.5E-05        | -2.0E-01        | 8.9E-09         |
|           | degradation (ubiquitin)      | val_PyrFam                          | 0.47        | 0.63                       | 8.76        | 13.53           | 0.05                             | 0.02        | 2.3E-05        | 5.1E-02         | -1.5E-07        |
|           | amino acid activation        | gly                                 | 0.12        | 0.25                       | 3.80        | 4.00            | 0.02                             | 0.02        | -3.6E-05       | -2.0E-02        | -6.0E-06        |
|           | amino acid activation        | gly_t                               | 0.17        | 0.38                       | 3.81        | 5.38            | 0.03                             | 0.05        | -1.1E-04       | -3.0E-02        | -6.1E-05        |
|           | <b>amino acid activation</b> | <b>gly_SerFam</b>                   | <b>0.27</b> | <b>0.51</b>                | <b>3.12</b> | <b>11.40</b>    | <b>0.05</b>                      | <b>0.08</b> | <b>2.0E-05</b> | <b>-9.0E-02</b> | <b>-2.8E-06</b> |
|           | <b>amino acid activation</b> | <b>ser_SerFam</b>                   | <b>0.28</b> | <b>0.51</b>                | <b>3.16</b> | <b>11.08</b>    | <b>0.05</b>                      | <b>0.08</b> | <b>3.6E-06</b> | <b>-9.3E-02</b> | <b>-1.5E-06</b> |
|           | assembly                     | met                                 | 0.06        | 0.13                       | 3.58        | 5.31            | 0.03                             | 0.02        | 1.6E-05        | 6.6E-03         | -6.8E-08        |
|           | assembly                     | met_t                               | 0.04        | 0.12                       | 3.30        | 4.05            | 0.01                             | 0.01        | -4.6E-05       | -7.4E-03        | -6.4E-07        |
|           | folding                      | his                                 | 0.09        | 0.14                       | 8.86        | 9.56            | 0.02                             | 0.01        | -1.2E-03       | 3.2E-02         | 5.1E-04         |
|           | folding                      | met                                 | 0.14        | 0.19                       | 3.58        | 3.67            | 0.01                             | 0.01        | 2.3E-05        | -2.8E-02        | 6.6E-08         |
|           | folding                      | ser                                 | 0.17        | 0.37                       | 3.59        | 6.63            | 0.05                             | 0.04        | 1.0E-03        | -5.8E-02        | 2.3E-05         |
|           | folding                      | SerFam                              | 0.13        | 0.23                       | 4.16        | 6.75            | 0.04                             | 0.03        | 9.3E-04        | 8.2E-03         | 2.7E-05         |
|           | folding                      | Total                               | 0.09        | 0.18                       | 8.48        | 9.06            | 0.02                             | 0.01        | -5.0E-05       | 2.3E-02         | 2.3E-07         |
|           | glycosylation                | thr_AspFam                          | 0.14        | 0.15                       | 3.17        | 5.19            | 0.05                             | 0.04        | 1.8E-05        | 1.5E-02         | 2.9E-08         |
|           | postrans                     | arg_t                               | 0.93        | 1.00                       | 3.95        | 4.45            | 0.02                             | 0.02        | 1.4E-04        | 4.1E-02         | -5.8E-07        |
|           | postrans                     | arg_GluFam                          | 1.00        | 1.00                       | 3.40        | 4.17            | 0.03                             | 0.02        | -7.4E-06       | -1.4E-01        | -2.4E-07        |
|           | postrans                     | glu_GluFam                          | 0.63        | 0.71                       | 3.11        | 3.28            | 0.02                             | 0.00        | -1.9E-05       | 1.1E-01         | 2.1E-06         |
| targeting | glu_t                        | 0.30                                | 0.44        | 3.36                       | 3.98        | 0.02            | 0.02                             | -1.6E-02    | 2.7E-02        | -3.4E-03        |                 |

216 Trait and pathway combinations where the MultiBLUP model improved prediction accuracy by at least 5% are bolded. Changes in  
217 bias (zero centered) and mean squared error (MSE) were taken as the absolute value of the difference between the MultiBLUP and  
218 GBLUP model, with negative values suggesting less bias/error in the MultiBLUP model.

219 <sup>a</sup>95 percentile based on random gene groups with the same number of markers.

220 <sup>b</sup>The difference in prediction accuracy (*r*) between the MultiBLUP and GBLUP models.

221 <sup>c</sup>The difference in reliability (*r*<sup>2</sup>/*h*<sup>2</sup>) between the MultiBLUP and GBLUP models.

## 222 **Pathway-level association testing reveals novel SNP associations for FAA traits**

223 The multiple testing correction in a typical GWAS is highly conservative, resulting in only  
224 the strongest marker-trait associations being classified as statistically significant at a genome-wide  
225 level [47,53]. To reassess previous GWAS results for FAA traits [23] at specific genomic regions,  
226 we performed pathway-level association testing for pathways which passed our significance  
227 criteria. When subsetting the GWAS *P*-values from [23] into biological pathways, we identify  
228 several novel associations that pass a false discovery rate (FDR) significance threshold of 10% (S3  
229 Table). Similar to previous results, we found significant associations for several BCAA traits and  
230 the amino acid degradation pathway, which contained a known causal gene (BCAT2) associated  
231 with BCAA traits [22]. We also found additional associations with the amino acid degradation  
232 genes DELTA-OAT (At1g10060) and isovaleryl-CoA-dehydrogenase (IVD, At3g45300). The  
233 IVD protein was previously shown to influence all BCAAs [54], but has not been identified in  
234 GWAS or QTL mapping studies, further supporting the effectiveness of the MultiBLUP model to  
235 study genetic regulation of metabolites.

236 Other significant associations were found for absolute levels of methionine (Met) and SNPs  
237 in the category for protein folding (Atg01230) and for the family-based ratio of threonine  
238 (Thr\_AspFam) and SNPs related to protein glycosylation (GALT31A, At1g32930; OST48,  
239 At5g66680). Single SNP associations were also identified for the family ratio of valine  
240 (Val\_PyrFam) and the ubiquitin-mediated protein degradation category, for relative levels of  
241 glycine (Gly\_t) and the protein amino acid activation category, and for absolute levels of  
242 phenylalanine (Phe) and the annotations for sulfur-containing specialized metabolites.

243 In the glutamate family, several significant associations were found for the alternative  
244 oxidase, amino acid degradation, and protein folding categories. For example, relative and family  
245 ratios of arginine (Arg\_t, and Arg\_GluFam, respectively) had a significant association with SNPs  
246 in the alternative oxidase 3 gene (AOX3, At1g32350), suggesting that free arginine may be related  
247 to alternative respiration. Notably, histidine related traits were associated with both the amino acid  
248 degradation category (His\_GluFam) and SNPs related to protein folding (His) (Fig 3, S3 Table).  
249 Annotations for the genes that were found significant for His\_GluFam (THA1, At1g08630; PED1,  
250 At2g33150; PYD4, Atg08860; LOG7, At5g06300) suggest that the metabolism of both threonine  
251 and lysine may be involved in determining the partition of histidine in dry *Arabidopsis* seeds,

252 consistent with the observed interconnectivity within the amino acid metabolic pathway and the  
 253 interdependent regulation of these amino acids [5,55].

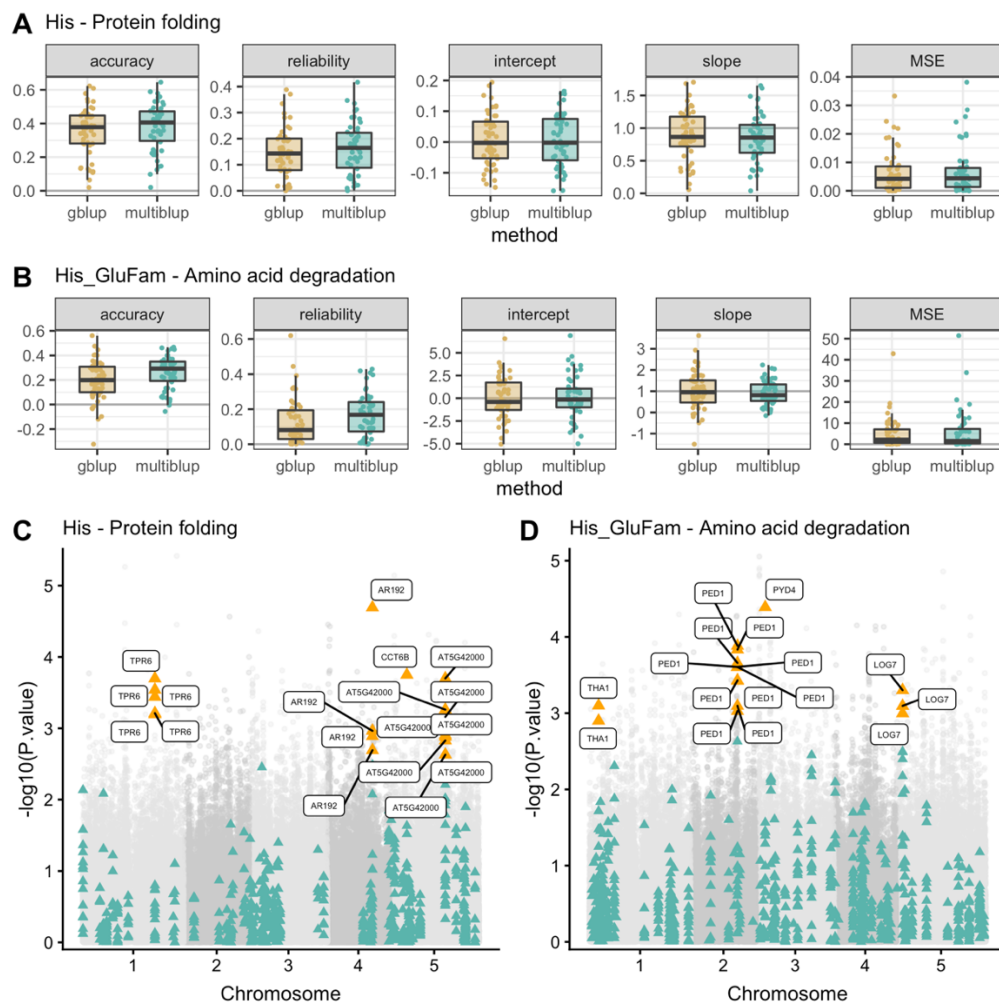

254 **Fig 3. Increases in prediction accuracy inform pathway-guided GWAS to reveal novel SNPs**  
 255 **related to histidine.**

256 Comparison of MultiBLUP and GBLUP models for prediction accuracy, reliability, bias (intercept  
 257 and slope), and mean squared error (MSE) for (A) absolute levels of histidine (His) and (B) the  
 258 family ratio of histidine (His\_GluFam). Note that the y-axis scale varies. GWAS results for (C)  
 259 the protein folding category and His and for (D) the amino acid degradation category and  
 260 His\_GluFam. All SNPs are shown in gray, with pathway SNPs highlighted as blue triangles. SNPs  
 261 with an FDR corrected p-value < 0.10 are annotated and highlighted in yellow.



## 262 Discussion

263 Previous studies on the genetic architecture for FAA and other metabolic traits suggest a  
264 complex genetic architecture comprised of small effect QTLs (e.g. [22,23,29]). These conclusions  
265 are recapitulated by previous biochemical and transcriptomic studies that investigated FAA  
266 homeostasis in the vegetative stage across changing environments [7,12,56,57]. Combined, these  
267 lines of evidence suggest FAA homeostasis is orchestrated by multiple pathways, including amino  
268 acid synthesis and degradation, primary metabolism, specialized metabolism, and protein  
269 metabolism (reviewed in [12]). In this study, we applied a genomic partitioning model  
270 (MultiBLUP) to investigate how FAA homeostasis is orchestrated in the model system  
271 *Arabidopsis thaliana*, allowing us to both test the feasibility of this approach and to further  
272 examine the genetic basis of FAAs in seeds. In addition to shedding light on the genetic complexity  
273 of FAA traits and the role of metabolic pathway genes in FAA homeostasis, this method can be  
274 used to develop hypotheses for biochemical and molecular studies.

275 Since its development nearly two decades ago [37], genomic prediction has dramatically  
276 altered the speed and scale of applied genetic and breeding research [58]. However, the use of  
277 genomic prediction has been primarily limited to agricultural species [59–61], likely because this  
278 is the realm where predicted breeding values are most directly applicable for breeding objectives.  
279 Recently, several studies have used genomic partitioning in prediction models to evaluate the  
280 relative influence of various genomic features, such as positional effects and gene annotation  
281 categories, on phenotypes of interest. Genomic partitioning is most successful when the partition  
282 is enriched for causal variant(s) [44], providing a framework for guided hypothesis testing. For  
283 example, [43] incorporated annotations for several biological pathways to determine which  
284 pathways were associated with udder health and milk production in dairy cattle. Similarly, gene  
285 ontology categories were leveraged to explore the genetic basis of different phenotypes in  
286 *Drosophila melanogaster* [42]. In maize, applications of genomic partitioning models have  
287 revealed that SNPs located in exons explain a larger proportion of phenotypic variance compared  
288 to other annotation categories [51]. The incorporation of prior biological information from  
289 transcriptomics, GWAS, and genes identified *in silico* also improved predictions of root  
290 phenotypes in cassava [62].

291 Surprisingly, genomic partitioning has not been widely applied in plants to decipher the  
292 underlying genetic contribution of biological processes to metabolic traits. We chose to use

293 genomic partitioning to investigate amino acid traits, with the goal of advancing our understanding  
294 of metabolic systems, their complexity, and the genetic determinants that may contribute to  
295 homeostasis of FAAs in seeds. Because FAA traits are part of core metabolism that is highly  
296 conserved, we hypothesize that many of our findings can be used to develop similar hypotheses in  
297 crop systems, where there is potential to contribute to the biofortification of essential amino acids.

298

### 299 **Genomic prediction of FAA traits in Arabidopsis seeds**

300 We first established the efficacy of the GBLUP model in a diversity panel of 313  
301 *Arabidopsis* individuals, which represents a substantial proportion of the known genetic variability  
302 present in *Arabidopsis* [63]. Because this setting is distinct from the closed breeding populations  
303 of dairy cattle, maize, and other agricultural species where genomic prediction is often applied  
304 (e.g. [40,59,61]), we were interested in testing how well genomic prediction would work in this  
305 panel. We were also interested in testing the utility of genomic prediction for FAA traits, which  
306 are highly conserved. The observation of moderate prediction accuracies for many of these traits  
307 suggests that there is LD between markers and causal loci, providing evidence that genomic  
308 prediction can be successfully applied in this system. Interestingly, we observe higher prediction  
309 accuracies for a greater proportion of absolute FAA levels compared to relative levels and family-  
310 based ratios, consistent with the previous hypothesis that, compared to metabolic ratios, absolute  
311 levels of metabolites have a more complex genetic architecture, where many loci of small effect  
312 are contributing to genetic variation.

313

### 314 **Genomic partitioning guided by metabolic processes generates new insights into the genetic 315 basis of FAAs**

316 We next applied a genomic partitioning approach, MultiBLUP, to investigate the  
317 association of different metabolic annotation categories with FAA traits in dry *Arabidopsis* seeds,  
318 focusing specifically on categories which are thought to influence FAA traits at this developmental  
319 stage. Our findings indicate that various FAA traits are associated with multiple biological  
320 pathways, many of which are not previously reported. On a broader scale, these results provide  
321 evidence that FAA composition in dry seeds is likely influenced by multiple metabolic processes  
322 rather than a single, predominant process. A notable caveat of this approach is that a given  
323 metabolic pathway may be in LD with an unrelated causal variant, and so the pathway itself may

324 not be associated with the trait tested. In addition, this approach is also most effective when small  
325 SNP sets explain a large proportion of the phenotypic variance for a trait [41]. As such, some of  
326 the pathways tested in this study may have been too large to find an association.

327  
328 **Branched chain amino acid traits are associated with amino acid synthesis and degradation**  
329 **pathways.** The inclusion of BCAA traits (leucine, isoleucine, valine) enabled both a proof of  
330 concept for the MultiBLUP approach and generated new insights into their genetic regulation.  
331 Previous work has demonstrated that a large effect QTL contributes to approximately 12-19% of  
332 the observed variability for BCAA traits, with the highest variance explained for relative level of  
333 isoleucine (Ile\_t) [22]. The causal gene was identified as branched chain amino acid transferase 2  
334 (BCAT2; At1g10070), which is part of the BCAA metabolic pathway [64]. Our results recapitulate  
335 this observation, showing that the amino acid degradation pathway, which contains the BCAT2  
336 haploblock, explained both a significant proportion of heritability (43%) and improved prediction  
337 accuracy by 6.7% for Ile\_t. This finding suggests that the MultiBLUP approach was effective at  
338 identifying a category of markers when a known causal variant is included.

339 Surprisingly, we also found that the BCAA family was the only group associated with  
340 amino acid synthesis, with a significant proportion of heritability explained for absolute levels of  
341 isoleucine, leucine, BCAA, and the pyruvate family composite trait. Previous work suggested that  
342 active amino acid synthesis is part of a metabolic switch occurring during the end of seed  
343 desiccation [21]. Under the metabolic switch scenario, we expected to see many FAA traits  
344 associated with the amino acid synthesis category. Instead, our results indicate that the effect of  
345 genes related to amino acid synthesis on FAA levels in dry seeds may be more limited.  
346 Furthermore, our findings further suggest that BCAA traits may also be influenced by genes related  
347 to glycolysis and isoprenoid metabolism, eluding to a more complex genetic architecture for these  
348 traits. Future studies will be necessary both to validate these observations and to further explore  
349 the genetic architecture for BCAA traits.

350  
351 **Specialized metabolism categories explain significant variation for aromatic amino acids.**

352 This study included measurements of natural variation for traits related to the aromatic amino acids  
353 (i.e. phenylalanine, tyrosine, and tryptophan). Notably, no pathway associations were identified  
354 for traits related to tryptophan. With the exception of an association of the composite aromatic

355 family trait (ShikFam) and the amino acid transport pathway, these traits were exclusively  
356 associated with specialized metabolism pathways. Specific categories associated with aromatic  
357 FAA traits included phenylpropanoids, flavonoids, and sulfur-containing compounds (Fig 2, Table  
358 3), consistent with the knowledge that aromatic amino acids can be converted to numerous  
359 specialized metabolites such as alkaloids, phenylpropanoids, and glucosinolates [65,66]. One  
360 notable pattern was that tyrosine-related traits were only associated with the flavonoid and  
361 phenylpropanoid categories. The finding of an association between tyrosine and flavonoids agrees  
362 with previous findings in transgenic rice seeds, which reported that flavonoids biosynthesized by  
363 exogenous enzymes may act as signaling molecules to alter amino acid biosynthesis [67]. For the  
364 family-based ratio of tyrosine (Tyr\_ShikFam), we observed a 10.8% increase in prediction  
365 accuracy when SNPs from the phenylpropanoid pathway were partitioned in the MultiBLUP  
366 model, suggesting SNPs in this pathway are contributing to the variation for Tyr\_ShikFam or are  
367 in strong LD with a causal variant. This is again consistent with biological expectations, as tyrosine  
368 is a known precursor for phenylpropanoid biosynthesis.

369 On the other hand, traits related to phenylalanine were associated with the pathway for  
370 sulfur-containing specialized metabolites (Fig 2), possibly influenced by a relationship to  
371 glucosinolates. The results from pathway-guided association mapping identified a significant SNP  
372 in the AOP1 gene (At4g03070, S3 Table), which encodes a probable 2-oxoglutarate-dependent  
373 dioxygenase involved in aliphatic glucosinolate biosynthesis. This result was surprising, as  
374 aliphatic glucosinolate biosynthesis begins with the chain elongation of methionine, suggesting  
375 that the relationship with phenylalanine in this case may be indirect. On the other hand, aromatic  
376 glucosinolates, which are produced from phenylalanine, are not considered widespread in  
377 *Arabidopsis* but are known to occur both in leaves and seeds in some ecotypes [68,69]. However,  
378 it is possible that the composition of aromatic glucosinolates in seeds and their effect on core  
379 metabolism is underestimated.

380 Interestingly, no association with nitrogenous specialized metabolism was detected for  
381 either phenylalanine or tyrosine, which are precursors for the nitrogen-containing compounds  
382 alkaloids. We also found no evidence of associations with protein metabolism, despite categories  
383 in this group being associated with most other amino acid families, and only one association with  
384 amino acid metabolism, suggesting that core metabolism may not play a critical role in the  
385 regulation of homeostasis for these traits.

386 **Traits in the aspartate family, especially methionine, show relationships with amino acid**  
387 **degradation, specialized metabolism, and protein metabolism.** Traits in the aspartate family  
388 were associated with multiple ontology categories. The most interesting of these were methionine-  
389 related traits, which were associated with amino acid degradation, specialized metabolism, and  
390 protein related metabolism. Since methionine is an essential amino acid, there have been many  
391 attempts to increase its content in seed crops via alteration of its metabolic pathway. Consistent  
392 with our observations, these attempts have also shown that alteration of methionine content in  
393 seeds affects multiple aspects of core metabolism [6,26]. We also found an association of  
394 methionine with the sulfur-containing specialized metabolism pathway. This finding is congruent  
395 with the knowledge that methionine is a precursor for aliphatic glucosinolate biosynthesis and with  
396 evidence that perturbing glucosinolates produces a significant increase in levels of free methionine  
397 in *Arabidopsis* leaves [16].

398  
399 **Traits in the serine family are exclusively associated with pathways related to protein**  
400 **metabolism.** Within the serine family, traits were exclusively associated with the protein  
401 metabolism categories for amino acid activation and protein folding. Interestingly, family-based  
402 ratios for both glycine (Gly\_SerFam) and serine (Ser\_SerFam) showed an increase in prediction  
403 accuracy of 5% when partitioning SNPs related to amino acid activation in the MultiBLUP model.  
404 This suggests that genes related to amino acid activation, such as tRNA synthetases, may  
405 contribute to the homeostasis of glycine and serine.

406 Surprisingly, we did not observe a relationship of serine family traits with the amino acid  
407 synthesis category, which includes genes in the serine acetyltransferase (SAT) gene family. These  
408 enzymes catalyze the first step in the conversion of serine to cysteine (Cys), which can then be  
409 converted to methionine. In maize kernels, overexpression of SAT has been linked to increased  
410 sulfur assimilation and higher levels of methionine, without incurring detrimental effects on plant  
411 yield [70]. Notably, measurements of cysteine are not included in the present study, and thus we  
412 may be unable to fully capture the dynamics of this agronomically important relationship.

413  
414 **The glutamate family showed surprising associations with amino acid degradation and**  
415 **sulfur-containing specialized metabolism.** Traits in the glutamate family were associated with  
416 amino acid degradation, primary metabolism, specialized metabolism, and protein metabolism.

417 Amino acids in the glutamate family are known to play a central role in core metabolism, mainly  
418 by functioning as one of the entry points for nitrogen into plants and via connections to the TCA  
419 cycle [7,71]. Hence, it was not surprising to find traits in this family associated with multiple  
420 categories, including the association of arginine traits with the pathway related to alternative  
421 oxidase activity (S3 Table). Two surprising associations were also identified: the association of  
422 His\_GluFam with amino acid degradation (Fig 3) and the association of glutamine related traits  
423 with sulfur-containing specialized metabolism (Fig 2). In each case, prediction accuracy was  
424 increased substantially (>5%) (Table 3). For His\_GluFam and the amino acid degradation  
425 category, pathway-guided association mapping identified SNPs in genes related to the catabolism  
426 of lysine and threonine, suggesting that these processes may be involved in the regulation of  
427 histidine composition in seeds (S3 Table). The genetic architecture for histidine is of special  
428 interest, with evidence suggesting that levels of histidine in seeds can influence important  
429 agronomic traits such as seed oil deposition [72]. However, the metabolic pathway for histidine  
430 biosynthesis and catabolism is not yet fully understood [73,74]. Previous work using network-  
431 guided GWAS has identified CAT4, a vacuolar transporter, that was associated with histidine traits  
432 [23]. Here, we present evidence that regulation of histidine may also be influenced by genes related  
433 to other aspects of amino acid degradation.

434

## 435 **Conclusions**

436 Our results demonstrate that genomic partitioning is a useful technique to identify genomic  
437 categories or features that are more likely to harbor causal variants. We leveraged genomic  
438 partitioning models to identify genomic regions that increase prediction accuracy. Using this  
439 approach, we are able to reduce the search space for causal variants and to identify novel candidate  
440 genes for traits related to methionine, threonine, histidine, arginine, glycine, phenylalanine, and  
441 BCAAs (S3 Table). These results can be used as a platform to further explore the biofortification  
442 of seed amino acids, to deepen our understanding of metabolic regulation, and to identify candidate  
443 regions for functional validation. Furthermore, this strategy of genomic partitioning and pathway  
444 association may be useful for classifying the genetic architecture of other complex metabolic traits  
445 in additional species.

## 446 **Methods**

### 447 **Plant materials and trait data**

448 For this study, we reanalyzed data of the absolute levels, relative compositions, and  
449 biochemical ratios for free amino acids in dry *Arabidopsis thaliana* seeds. These traits were  
450 previously measured in [22,23] for 313 accessions of the Regional Association Mapping panel  
451 [63,75]. In summary, seeds from two plants of each accession were harvested from three  
452 independent grow outs. Absolute levels of FAAs (nmol/mg seed) were quantified using liquid  
453 chromatography–tandem mass spectrometry multiple reaction monitoring (LC-MS/MS MRM; see  
454 [22,23] for further details). Eighteen of the 20 proteinogenic amino acids were measured, including  
455 composite phenotypes for the sum of all FAAs measured (total FAAs) and for each of five  
456 biochemical families as determined by metabolic precursor (S1 Fig, S1 Table). This prior  
457 knowledge of biochemical relationships among FAAs was used to determine metabolic ratios,  
458 which can represent for example the proportion of a metabolite to a related biochemical family or  
459 the ratio between two metabolites that share a metabolic precursor [30,76,77]. For each amino  
460 acid, relative composition was calculated as the absolute level over the total. Additional ratio traits  
461 were determined based on biochemical family affiliation [23]. Traits and their respective  
462 abbreviations are described in S1 Table. Overall, the 65 phenotypes included 25 absolute FAA  
463 levels (individual amino acids and composite traits), 17 relative levels (ratio of absolute level for  
464 an amino acid compared to total FAA content), and 23 family-derived traits (ratio of absolute level  
465 for an amino acid to the total FAA content within a given family).

466 The best linear unbiased predictors (BLUPs) for each accession, reported in [22], were  
467 used as the phenotype data in this study. Briefly, BLUPs were generated by first fitting a mixed  
468 model including replicate and accessions as random effects. Outliers were then removed for 38 of  
469 the 65 traits based on Studentized deleted residuals [78]. Following outlier removal, the Box-Cox  
470 procedure [79] was applied to transform each trait to avoid violating model assumptions for  
471 normally distributed error terms and constant variance. The BLUP for each accession was then  
472 determined for all transformed traits using a mixed model fit across all three replicates. This  
473 procedure removed the effect of growing environment but did not account for genetic differences.

## 474 Genetic data

475 The accessions used in this study were previously genotyped using a 250k SNP panel [80],  
476 v3.06. The software PLINK v1.9 was used to filter for minor allele frequency (MAF) > 0.05 (--  
477 maf 0.05), reducing the number of SNPs from 214,051 to 199,452.

478 To partially account for population structure, quality filtered SNPs were first pruned for  
479 linkage disequilibrium (LD) in PLINK v1.9 using a window size of 10kb that shifted by five SNPs  
480 and a pairwise LD threshold of 0.1. The SNPs exceeding this threshold were removed, reducing  
481 the number of SNPs from 199,452 to 45,122. These LD pruned SNPs were then used as the input  
482 for principal component analysis in R v3.6.0 [86] using the ‘prcomp’ function. Phenotypes were  
483 adjusted for population structure by regressing the first six principal components, which explained  
484 9.4% of the variance (S3 Fig), against each phenotype and returning the residuals (see similar  
485 approach in [81]). These residuals were used as the phenotypes for downstream analyses along  
486 with the full set of 199,452 quality filtered SNPs.

487

## 488 Selection of pathway SNPs

489 To examine specific metabolic pathways, SNPs were selected based on annotation  
490 categories in the MapMan software [82] for the TAIR10 annotation of *Arabidopsis* [83]. We  
491 focused broadly on four categories: amino acid metabolism (three pathways), primary metabolism  
492 (three pathways), specialized metabolism (five pathways), and protein metabolism (nine  
493 pathways) (Table 2). The SNP positions were first matched to the corresponding Ensembl gene id  
494 using the biomaRt package [84,85] in R v3.6.0 [86]. We then selected all SNPs within a 2.5 kb  
495 range of the start and stop position for each gene, which is within the range of the estimated average  
496 in *Arabidopsis* [87] and includes upstream promoter regions. Specific pathways and corresponding  
497 MapMan annotation categories, including the number of genes and SNPs represented, are  
498 described in Table 2. We followed MapMan annotations for all genes except BCAT2 (At1g10070),  
499 which was moved from the amino acid synthesis pathway to the amino acid degradation pathway  
500 along with other SNPs in the same haploblock (chromosome 1, 3274080 to 397645 bp). This  
501 decision was based on previous work in which *bcat2* mutants showed higher accumulation of



502 branched-chain amino acids in seeds, thereby demonstrating that BCAT2 has catabolic activity  
503 [22].

504

## 505 **Prediction models**

506 The Linkage Disequilibrium Adjusted Kinship (LDAK) software v5.0 [88]  
507 (<http://dougsped.com/ldak/>) was used to implement two models for genomic prediction of each  
508 trait: GBLUP, in which random effects are drawn from the same effect size distribution, and  
509 MultiBLUP, in which random effects can be drawn from distributions with distinct effect size  
510 variances [41]. First, the pairwise genetic similarity between individuals was estimated using a  
511 genomic similarity matrix (GSM), or kinship matrix [89,90]:

$$K = XX'/p, \quad (1)$$

512 where  $X$  is a matrix of SNP genotypes,  $X'$  is the transpose of  $X$ , and  $p$  is the number of SNPs.

513 Genomic prediction was performed for all markers using a random regression BLUP (RR-  
514 BLUP) model as described in [37,91], in which phenotypes are regressed against markers that  
515 share a common effect size variance distribution. Briefly, this model equates each phenotypic  
516 value to a normally distributed random effect of each marker, and the BLUP of each random  
517 marker effect is subjected to a ridge regression penalty. The RR-BLUP model is considered  
518 equivalent to a GBLUP model, which uses a genomic relationship matrix in place of markers [37].

519 To model biological pathways, we used the MultiBLUP model, which extends the RR-  
520 BLUP model to incorporate multiple kinship matrices as random effects with distinct effect size  
521 variances. For this study, the MultiBLUP model included random effects for sets of markers within  
522 a biological pathway ( $m$ ) and for the remaining markers not included in a given pathway ( $\notin m$ ).  
523 Following equation (1), markers within a biological pathway have a correlation structure  $K^m$ , with  
524 the matrix form  $X^m$ , where columns refer to the set of markers in the pathway. In this case, the set  
525 of pathway markers,  $R_m$ , contains a total of  $p_m$  markers with the effect size of the  $j^{\text{th}}$  marker  
526 distributed as  $\beta_j^m \sim N(0, \sigma_m^2/p_m)$ . Similarly, the correlation structure for the remaining markers  
527 is  $K^{\notin m}$ , has the matrix form  $X^{\notin m}$  for the set  $R_{\notin m}$  of size  $p_{\notin m}$  and the effect size of the  $j^{\text{th}}$  marker is

528 distributed as  $\beta_j^{\notin m} \sim N(0, \sigma_{\notin m}^2/p_{\notin m})$ . These terms were used in the following random regression  
529 model from [41] to perform MultiBLUP:

$$Y_i = \beta_0 + \sum_{j \in R_m} X_{ij}^m \beta_j^m + \sum_{j \notin R_m} X_{ij}^{\notin m} \beta_j^{\notin m} + \varepsilon_i, \quad (2)$$

530 where  $Y_i$  is the observed phenotypic value of the  $i^{\text{th}}$  individual,  $\beta_0$  is the intercept, and  $\varepsilon_i$  is the  
531 normally distributed random error term associated with the  $i^{\text{th}}$  individual.

532 For our purposes, kinship matrices were estimated in the LDAK software for either all  
533 SNPs (GBLUP) or each SNP partition (MultiBLUP, i.e. pathway SNPs and all other remaining  
534 SNPs) by ignoring LD adjusted SNP weightings (--ignore-weights YES) so that each marker in  
535 the model was assigned an effect. This avoids distributing a marker effect to neighboring markers  
536 that are in strong LD, which can increase noise in the prediction model, although it may bias  
537 estimates of variance. Predictors were scaled by setting the parameter  $\alpha = 0$  (--power 0), a  
538 commonly used value in plant and animal breeding that assumes each SNP has the same effect  
539 size distribution regardless of MAF [92].

540

## 541 Heritability

542 The GBLUP and MultiBLUP models use average information restricted maximum  
543 likelihood (REML, see [41] for details) to compute variance component estimates for  $\sigma_1^2, \dots, \sigma_M^2$   
544 and  $\sigma_e^2$ . Because we were only interested in a single partition for any given pathway, we refer to  
545 variance estimates for a given partition  $m$  as  $\hat{\sigma}_m^2$  and variance estimates for all other markers not  
546 included in this partition as  $\hat{\sigma}_{\notin m}^2$ . In the case of the GBLUP model,  $\hat{\sigma}_m^2$  is the estimate of variance  
547 for all SNPs. These estimates were used to calculate genomic heritability as the ratio of additive  
548 genomic variance explained for a given marker set ( $\sigma_m^2$ ) over the total variance explained (the sum  
549 of  $\sigma_m^2$ ,  $\sigma_{\notin m}^2$ , and the residual variance,  $\sigma_e^2$ ):

$$h^2 = \frac{\sigma_m^2}{\sigma_m^2 + \sigma_{\notin m}^2 + \sigma_e^2}. \quad (3)$$

550 For the MultiBLUP model, the proportion of genomic heritability explained was calculated as:

$$\frac{h_m^2}{h_m^2 + h_{\notin m}^2}, \quad (4)$$

551 where  $h_m^2$  is the genomic heritability explained by SNPs in a given genomic partition and  $h_{\notin m}^2$  is  
552 the genomic heritability explained by all other SNPs not included in the partition.

553

## 554 **Model performance**

555 The performance of prediction models was determined using ten-fold cross validation with  
556 a one-fold holdout, with the same training and testing sets used for the GBLUP and MultiBLUP  
557 models. For each cross validation, 10% of the data were withheld when fitting the GBLUP and  
558 MultiBLUP models. Variance estimates from REML were then used to determine the genomic  
559 estimated breeding value (GEBV) based on marker data for the excluded individuals. This process  
560 was repeated five times for a total of 50 cross validations per trait. Prediction accuracy was then  
561 calculated as  $r(\hat{g}, g)$ , where  $\hat{g}$  represents the estimated breeding values and  $g$  represents the  
562 observed phenotype values. Reliability, which is the coefficient of determination ( $r^2$ ) scaled by  
563 heritability, was calculated as  $\frac{r^2}{h^2}$  [93]. Bias was calculated as the simple linear regression  
564 coefficients (i.e., the intercept and slope estimates) between the estimated breeding values and  
565 observed phenotype, with a slope estimate of one and an intercept estimate of zero indicating no  
566 bias. Lastly, mean squared error (MSE), which measures prediction bias and variability, was  
567 calculated as the mean of the squared difference between the observed phenotypes and GEBVs,  
568  $\frac{1}{n} \sum (g - \hat{g})^2$  where  $n$  is the number of observations.

569

## 570 **Generation of an empirical null distribution**

571 To test if a metabolic pathway explained more variation than expected by chance, we  
572 generated an empirical null distribution. The null hypothesis was that a given biological pathway  
573 will explain a similar amount of trait variance as the same number of SNPs in randomly selected  
574 gene groups [43]. To establish a null distribution, we first defined 5,000 random gene groups with  
575 a target number of SNPs that ranged uniformly from 1 to 50,000 SNPs. For each random subset,  
576 all SNPs within 2.5 kb of the start and stop positions were sampled for a randomly selected gene.

577 This process was repeated by randomly sampling genes one at a time until the target number of  
578 SNPs for each subset was achieved. As discussed in [43], this approach does not explicitly model  
579 variation in other parameters (e.g., allele frequencies, the number of markers, and LD), but it is  
580 expected that these differences are captured to some extent by the sampling process.

581 Next, we used two metrics to test if SNPs in a given pathway explained more genomic  
582 variance than expected by chance and increased model fit for each trait: (1) the proportion of  
583 genomic heritability explained by a pathway compared to the random gene groups described  
584 above, and (2) the likelihood ratio (LR) as a measure of pathway model fit compared to the model  
585 fit of random SNP subsets. Each metric was evaluated by testing pathway values against the null  
586 distribution of values computed from the random gene groups described above. The proportion of  
587 heritability explained was calculated as described previously and the LR was calculated as twice  
588 the difference between the log likelihood of the MultiBLUP model and the log likelihood of the  
589 GBLUP model. Significant values for both of these metrics suggest that a given pathway  
590 annotation has biological importance [43].

591 To establish significance thresholds for the LR and proportion of heritability explained, we  
592 first accounted for rounding errors by setting heritability estimates that were negative to zero and  
593 greater than one to one. These negative estimates are possible because we did not constrain  
594 estimates to be non-negative in the REML solver (--constrain NO) and may occur as a consequence  
595 of small sample size and/or if the true heritability is low. Heritability estimates with negative  
596 standard deviations and/or a negative LR suggested the model did not converge and were excluded  
597 (S2 Table). Relatively few random gene groups were filtered for each trait except valine (Val),  
598 which had a high proportion (1504 observations) of random gene groups with a negative LR.  
599 Significance thresholds were then determined based on the 95th percentile of both the proportion  
600 of heritability explained and the LR using smooth quantile regression in the R package ‘quantreg’  
601 with constraint set to ‘increasing’.

## 602 **Identifying biological pathways of interest**

603 In summary, a pathway was considered of interest for a trait if the MultiBLUP model passed  
604 all three of the following criteria:

- 605 1.) The MultiBLUP model explained a greater proportion of the genomic heritability than the  
606 95th percentile of the same number of randomly selected markers.
- 607 2.) The LR for the MultiBLUP model was greater than the 95th percentile of LR for the same  
608 number of randomly selected markers.
- 609 3.) The MultiBLUP model improved prediction accuracy by at least 1% compared to the  
610 GBLUP model.

611 Together, criteria (1) and (2) established that the pathway being tested contained significantly more  
612 information than a random set of SNPs. Criteria (3) was imposed to ensure that there was a  
613 meaningful difference in prediction accuracy when pathway information was incorporated via  
614 MultBLUP compared to the naive GBLUP model that incorporated no pathway information.

615

## 616 **Pathway-level association analysis**

617 If a given trait and pathway combination passed all of the above criteria, P-values for the  
618 SNPs in the pathway were selected from the GWAS results reported in [22,23]. For each trait and  
619 pathway combination, the Benjamini and Hochberg [94] procedure was conducted on the  
620 corresponding set of SNPs to control the false discovery rate (FDR) at 10%.

621

## 622 **Data availability**

623 Genotype data are previously published and were accessed from  
624 <https://github.com/Gregor-Mendel-Institute/atpolydb/wiki> [80]. The scripts and phenotypic data  
625 used for this analysis are publicly available on GitHub at [https://github.com/mishaploid/aa-](https://github.com/mishaploid/aa-genomicprediction)  
626 [genomicprediction](https://github.com/mishaploid/aa-genomicprediction).

627 **Acknowledgements**

628           We are grateful to Dan Kliebenstein, Jinliang Yang, Jeffrey Ross-Ibarra, and two  
629 anonymous reviewers for helpful comments and discussions that improved the manuscript. We  
630 also thank Doug Speed for advice on cross-validation in LDAK.

631

632 **Funding**

633           This project was supported by the USDA Agricultural Research Service, the University of  
634 Missouri Division of Biological Sciences (Columbia, MO, USA), the NSF Postdoctoral Research  
635 Fellowship in Biology Grant No. 1711347 for SDT, and the NSF Graduate Research Fellowship  
636 Grant No. DGE-1424871 for KAB. Any opinions, findings, and conclusions or recommendations  
637 expressed in this material are those of the author(s) and do not necessarily reflect the views of the  
638 National Science Foundation.

639 **Supporting information**

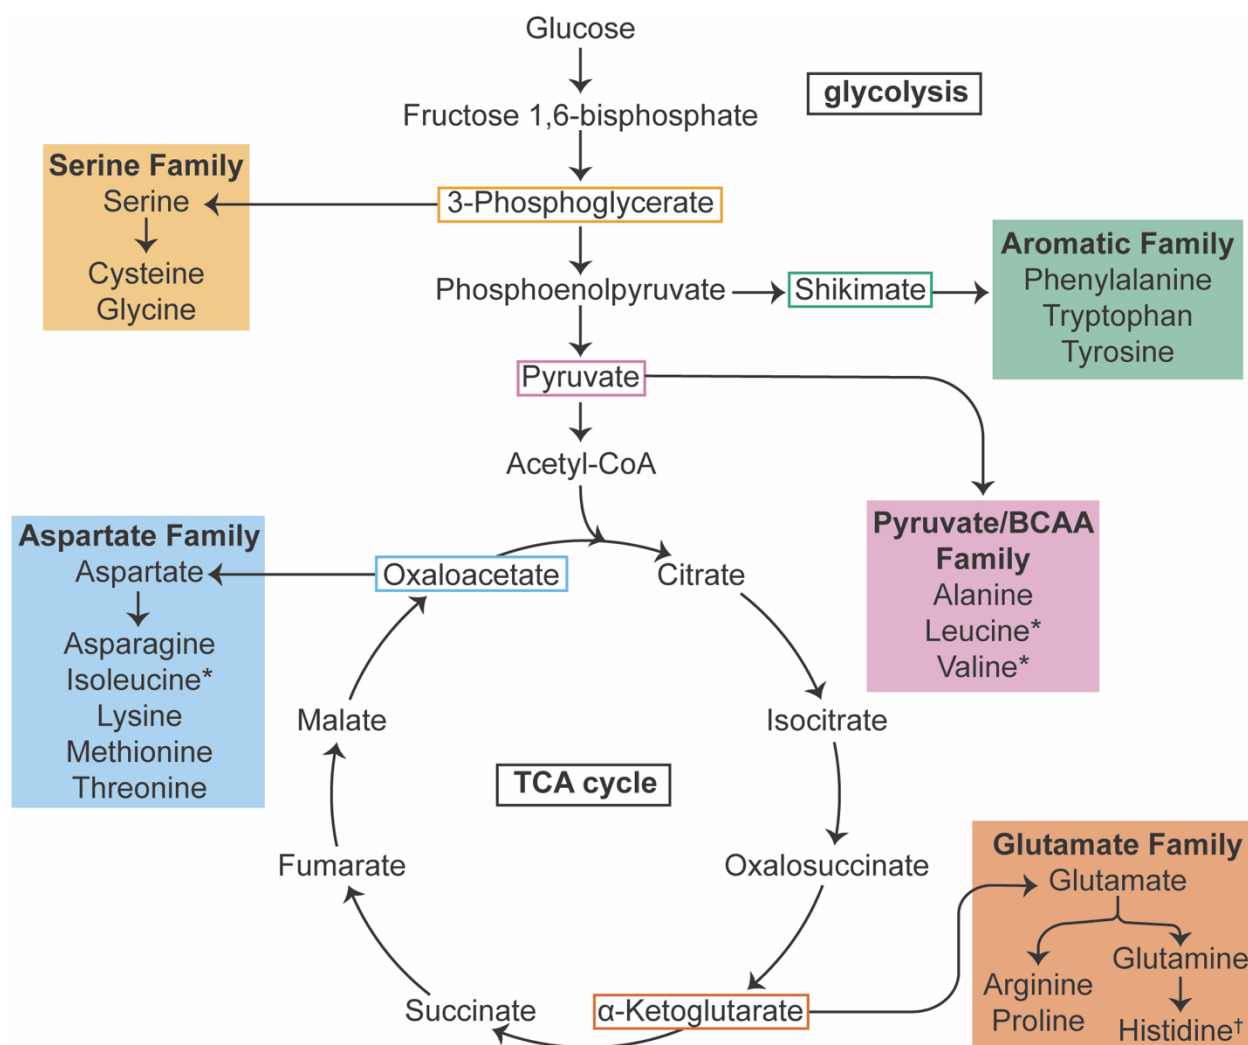

640 **S1 Fig. Biochemical relationships among amino acids.**

641 Colors indicate different amino acid families and boxes indicate the corresponding precursor. The  
 642 branched-chain amino acids include Leu, Ile, Val are split across the Aspartate and Pyruvate family  
 643 and therefore denoted with asterisks (\*). Note that histidine (†) does not belong explicitly to the  
 644 families identified here, but often is considered as part of the glutamate family.

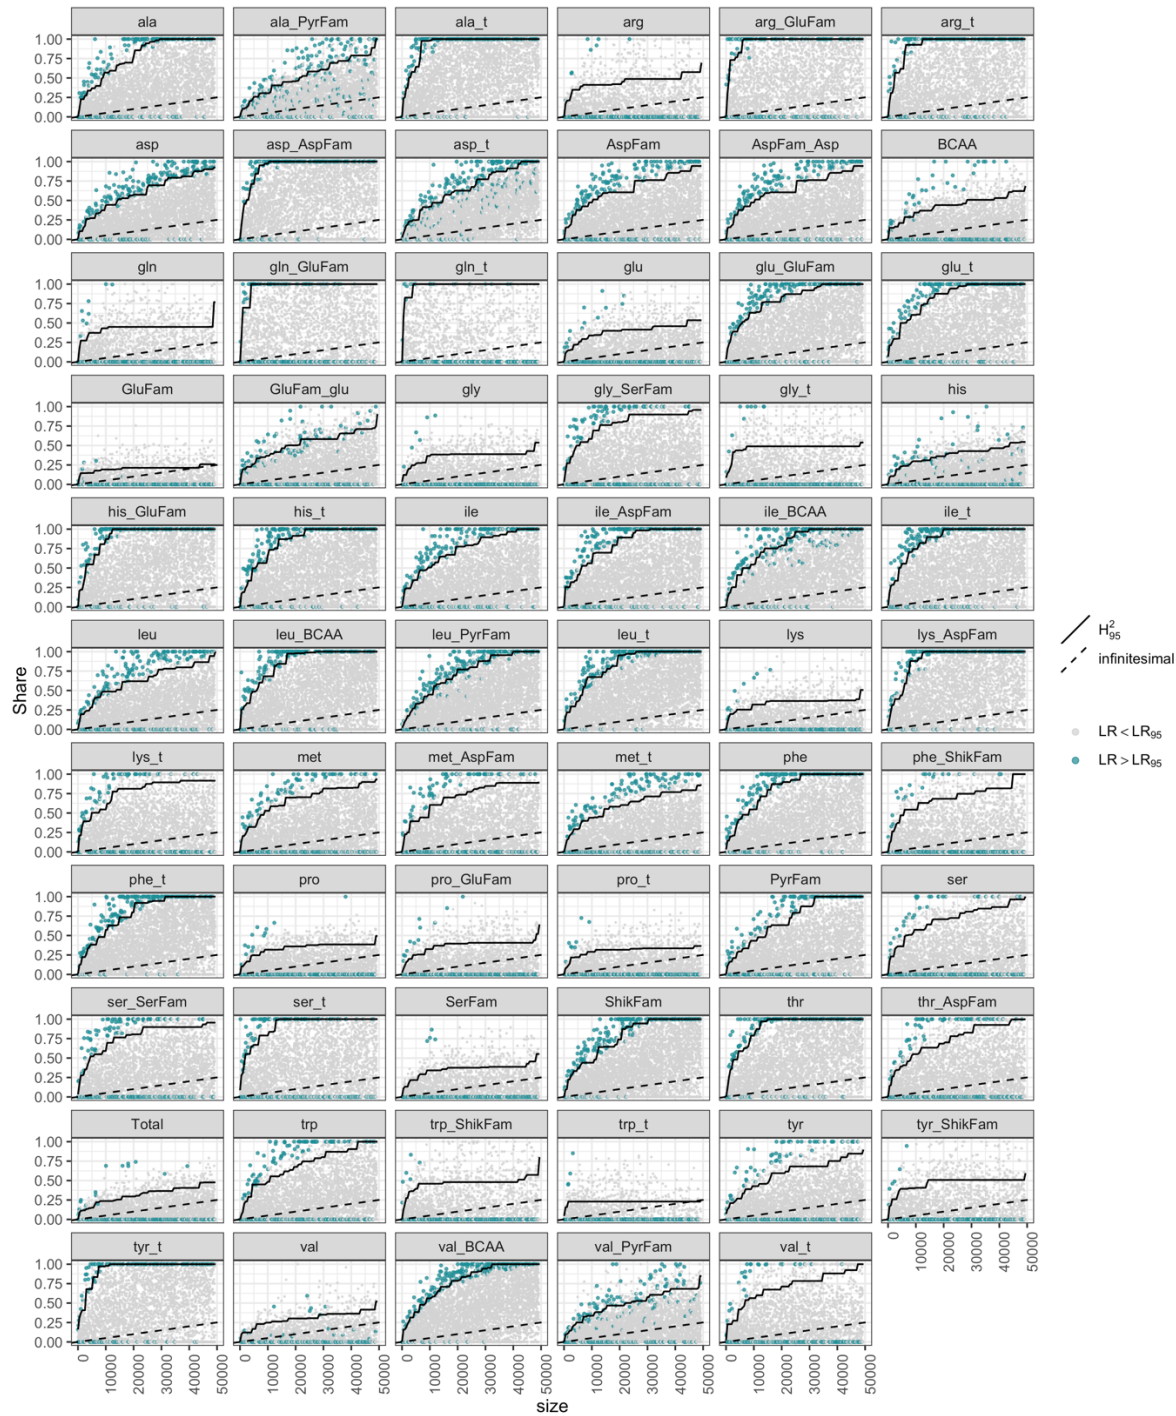

645 **S2 Fig. Genomic variance explained by 5,000 random SNP subsets for free amino acid traits.**  
 646 Each point represents a different random gene group with the number of SNPs indicated on the x-  
 647 axis. The solid line indicates the 95th percentile for the proportion of heritability explained and the  
 648 dashed line represents the expectation when all SNPs have a similar effect size. Points are colored  
 649 blue if the likelihood ratio for a random set exceeds 95% percentile for the LR of the same trait.



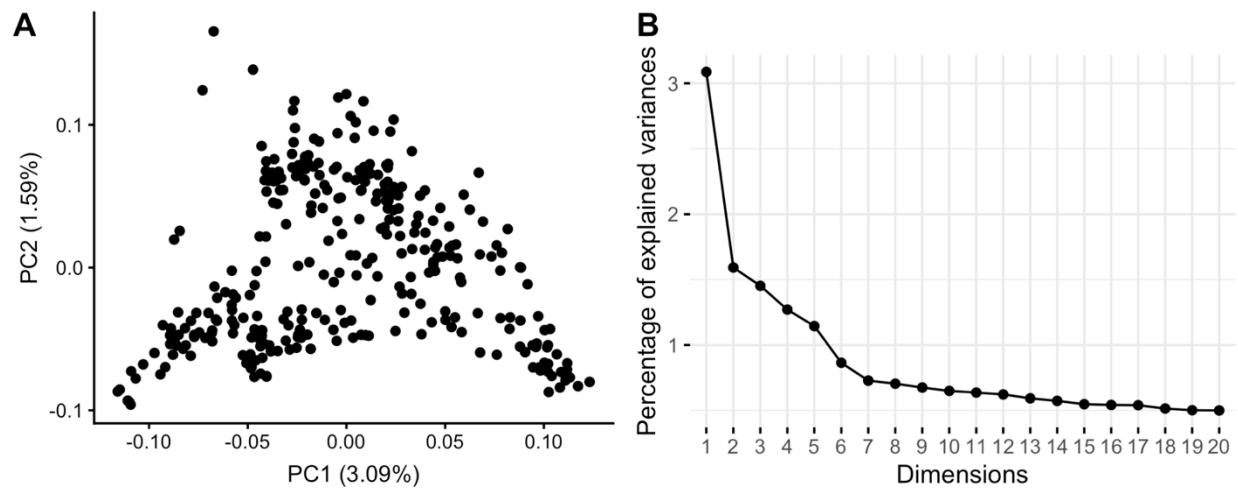

650 **S3 Fig. Principal component analysis (PCA) of genetic data for the 313 Arabidopsis**  
651 **accessions used in this study.**

652 (A) PCA scatterplot and percent variation explained for the first two principal components. (B)  
653 Screeplot showing the percent variance explained by each principal component.

654 **S1 Table. List of seed free amino acid traits calculated from the quantification of 18 FAA and biochemical family affiliations.**  
 655 Strings of AA letter codes represent the sum of those AAs.

656

| Amino acids one letter code |   | Absolute levels                                                                                                                                                                                                                                                        | Relative levels to total                                                                                                                                                                                               | Biochemistry based metabolic ratios, grouped by AA families' affiliation                                              |                                                                                                                                              |                                                                          |
|-----------------------------|---|------------------------------------------------------------------------------------------------------------------------------------------------------------------------------------------------------------------------------------------------------------------------|------------------------------------------------------------------------------------------------------------------------------------------------------------------------------------------------------------------------|-----------------------------------------------------------------------------------------------------------------------|----------------------------------------------------------------------------------------------------------------------------------------------|--------------------------------------------------------------------------|
| Ala                         | A | <b>AA-Abs<br/>Total = Sum of 18 AA</b><br>A<br>D<br>E<br>F<br>G<br>H<br>I<br>K<br>L<br>M<br>P<br>Q<br>R<br>S<br>T<br>V<br>W<br>Y<br>Total<br>IMTDK (Asp family)<br>IVL (BCAA family)<br>LAV (Pyr family)<br>EHPRQ (Glu family)<br>WFY (Shik family)<br>SG (Ser family) | <b>AA/Total</b><br>A/Total<br>D/Total<br>E/Total<br>F/Total<br>G/Total<br>H/Total<br>I/Total<br>K/Total<br>L/Total<br>M/Total<br>P/Total<br>Q/Total<br>R/Total<br>S/Total<br>T/Total*<br>V/Total<br>W/Total<br>Y/Total | <b>Asp Family = Ile, Met, Thr, Asp Lys (IMTDK)</b><br>D/IMTDK<br>K/IMTDK<br>M/IMTDK<br>T/IMTDK<br>IMTDK/D             | <b>BCAA Family = Ile, Val, Leu (IVL)<br/>Pyr Family=Leu, Ala, Val (LAV)</b><br>I/IVL<br>V/IVL<br>L/IVL<br>A/LAV<br>L/LAV<br>V/LAV<br>I/IMTDK |                                                                          |
| Asp                         | D |                                                                                                                                                                                                                                                                        |                                                                                                                                                                                                                        |                                                                                                                       |                                                                                                                                              |                                                                          |
| Glu                         | E |                                                                                                                                                                                                                                                                        |                                                                                                                                                                                                                        |                                                                                                                       |                                                                                                                                              |                                                                          |
| Phe                         | F |                                                                                                                                                                                                                                                                        |                                                                                                                                                                                                                        |                                                                                                                       |                                                                                                                                              |                                                                          |
| Gly                         | G |                                                                                                                                                                                                                                                                        |                                                                                                                                                                                                                        |                                                                                                                       |                                                                                                                                              |                                                                          |
| His                         | H |                                                                                                                                                                                                                                                                        |                                                                                                                                                                                                                        |                                                                                                                       |                                                                                                                                              |                                                                          |
| Ile                         | I |                                                                                                                                                                                                                                                                        |                                                                                                                                                                                                                        |                                                                                                                       |                                                                                                                                              |                                                                          |
| Lys                         | K |                                                                                                                                                                                                                                                                        |                                                                                                                                                                                                                        |                                                                                                                       |                                                                                                                                              |                                                                          |
| Leu                         | L |                                                                                                                                                                                                                                                                        |                                                                                                                                                                                                                        |                                                                                                                       |                                                                                                                                              |                                                                          |
| Met                         | M |                                                                                                                                                                                                                                                                        |                                                                                                                                                                                                                        |                                                                                                                       |                                                                                                                                              |                                                                          |
| Pro                         | P |                                                                                                                                                                                                                                                                        |                                                                                                                                                                                                                        |                                                                                                                       |                                                                                                                                              |                                                                          |
| Gln                         | Q |                                                                                                                                                                                                                                                                        |                                                                                                                                                                                                                        |                                                                                                                       |                                                                                                                                              |                                                                          |
| Arg                         | R |                                                                                                                                                                                                                                                                        |                                                                                                                                                                                                                        |                                                                                                                       |                                                                                                                                              |                                                                          |
| Ser                         | S |                                                                                                                                                                                                                                                                        |                                                                                                                                                                                                                        |                                                                                                                       |                                                                                                                                              |                                                                          |
| Thr                         | T |                                                                                                                                                                                                                                                                        |                                                                                                                                                                                                                        |                                                                                                                       |                                                                                                                                              |                                                                          |
| Val                         | V |                                                                                                                                                                                                                                                                        |                                                                                                                                                                                                                        |                                                                                                                       |                                                                                                                                              |                                                                          |
| Trp                         | W |                                                                                                                                                                                                                                                                        |                                                                                                                                                                                                                        |                                                                                                                       |                                                                                                                                              |                                                                          |
| Tyr                         | Y |                                                                                                                                                                                                                                                                        |                                                                                                                                                                                                                        |                                                                                                                       |                                                                                                                                              |                                                                          |
|                             |   |                                                                                                                                                                                                                                                                        |                                                                                                                                                                                                                        | <b>Glu Family = Glu, His, Pro, Arg, Gln (EHPRQ)</b><br>Q/EHPRQ<br>E/EHPRQ<br>H/EHPRQ<br>P/EHPRQ<br>R/EHPRQ<br>EHPRQ/E | <b>Shikimate (Aromatic) Fam = Trp, Phe, Tyr (WFY)</b><br>W/WFY<br>F/WFY<br>Y/WFY                                                             |                                                                          |
|                             |   |                                                                                                                                                                                                                                                                        |                                                                                                                                                                                                                        |                                                                                                                       |                                                                                                                                              | <b>Ser Family = Ser, Gly (Cysteine-not detected -SG)</b><br>G/SG<br>S/SG |
|                             |   |                                                                                                                                                                                                                                                                        |                                                                                                                                                                                                                        |                                                                                                                       |                                                                                                                                              |                                                                          |
|                             |   |                                                                                                                                                                                                                                                                        |                                                                                                                                                                                                                        |                                                                                                                       |                                                                                                                                              |                                                                          |
|                             |   |                                                                                                                                                                                                                                                                        |                                                                                                                                                                                                                        |                                                                                                                       |                                                                                                                                              |                                                                          |
|                             |   |                                                                                                                                                                                                                                                                        |                                                                                                                                                                                                                        |                                                                                                                       |                                                                                                                                              |                                                                          |

\* T/Total not included due to errors when generating BLUPs

657

658 **S2 Table. Summary of null gene groups for each free amino acid trait.**

659 Includes the number of gene groups that passed filtering criteria, failed to converge, or had a  
 660 negative likelihood ratio statistic.

| <b>Trait</b> | <b>Number of gene groups</b> | <b>Failed to converge</b> | <b>Negative LR</b> |
|--------------|------------------------------|---------------------------|--------------------|
| ala          | 4998                         | 1                         | 1                  |
| ala_PyrFam   | 4958                         | 26                        | 17                 |
| ala_t        | 4998                         | 0                         | 2                  |
| arg          | 4996                         | 0                         | 4                  |
| arg_GluFam   | 4997                         | 1                         | 3                  |
| arg_t        | 4992                         | 6                         | 4                  |
| asp          | 4997                         | 0                         | 3                  |
| asp_AspFam   | 4999                         | 1                         | 1                  |
| asp_t        | 4992                         | 5                         | 3                  |
| AspFam       | 4999                         | 0                         | 1                  |
| AspFam_Asp   | 4999                         | 0                         | 1                  |
| BCAA         | 4988                         | 0                         | 12                 |
| gln          | 5000                         | 0                         | 0                  |
| gln_GluFam   | 4997                         | 1                         | 3                  |
| gln_t        | 4985                         | 10                        | 5                  |
| glu          | 4998                         | 0                         | 2                  |
| glu_GluFam   | 5000                         | 0                         | 0                  |
| glu_t        | 4994                         | 2                         | 4                  |
| GluFam       | 4954                         | 10                        | 36                 |
| GluFam_glu   | 4989                         | 2                         | 9                  |
| gly          | 4999                         | 0                         | 1                  |
| gly_SerFam   | 4996                         | 1                         | 3                  |
| gly_t        | 4994                         | 1                         | 5                  |
| his          | 4999                         | 0                         | 1                  |
| his_GluFam   | 4997                         | 1                         | 2                  |
| his_t        | 4997                         | 0                         | 3                  |
| ile          | 4999                         | 0                         | 1                  |
| ile_AspFam   | 4999                         | 0                         | 1                  |
| ile_BCAA     | 4995                         | 3                         | 2                  |
| ile_t        | 5000                         | 0                         | 0                  |
| leu          | 4998                         | 0                         | 2                  |
| leu_BCAA     | 4998                         | 1                         | 1                  |
| leu_PyrFam   | 4982                         | 2                         | 16                 |
| leu_t        | 4998                         | 0                         | 2                  |
| lys          | 5000                         | 0                         | 0                  |
| lys_AspFam   | 4998                         | 1                         | 1                  |
| lys_t        | 4997                         | 0                         | 3                  |
| met          | 4999                         | 0                         | 1                  |
| met_AspFam   | 4995                         | 0                         | 5                  |
| met_t        | 4999                         | 1                         | 0                  |
| phe          | 4997                         | 1                         | 2                  |
| phe_ShikFam  | 4998                         | 0                         | 2                  |
| phe_t        | 4997                         | 0                         | 3                  |
| pro          | 5000                         | 0                         | 0                  |
| pro_GluFam   | 4998                         | 0                         | 2                  |
| pro_t        | 4999                         | 0                         | 1                  |
| PyrFam       | 4997                         | 1                         | 2                  |

| <b>Trait</b> | <b>Number of gene groups</b> | <b>Failed to converge</b> | <b>Negative LR</b> |
|--------------|------------------------------|---------------------------|--------------------|
| ser          | 5000                         | 0                         | 0                  |
| ser_SerFam   | 4996                         | 0                         | 4                  |
| ser_t        | 4997                         | 0                         | 3                  |
| SerFam       | 4997                         | 0                         | 3                  |
| ShikFam      | 4999                         | 0                         | 1                  |
| thr          | 4996                         | 0                         | 4                  |
| thr_AspFam   | 4998                         | 0                         | 2                  |
| Total        | 4999                         | 0                         | 1                  |
| trp          | 4999                         | 0                         | 1                  |
| trp_ShikFam  | 4993                         | 1                         | 6                  |
| trp_t        | 4997                         | 1                         | 2                  |
| tyr          | 4999                         | 0                         | 1                  |
| tyr_ShikFam  | 4997                         | 0                         | 3                  |
| tyr_t        | 4997                         | 1                         | 2                  |
| val          | 3491                         | 8                         | 1504               |
| val_BCAA     | 5000                         | 0                         | 0                  |
| val_PyrFam   | 4987                         | 7                         | 6                  |
| val_t        | 4997                         | 0                         | 3                  |

661 **S3 Table. Significant results from pathway guided association testing ( $\alpha = 0.10$ ).**

662 Columns include the original GWAS p-values, the number of SNPs tested for each pathway, and  
663 the pathway-level FDR corrected p-value. (see supplementary information)

## 664 **References**

- 665 1. Wu Y, Messing J. Proteome balancing of the maize seed for higher nutritional value. *Front*  
666 *Plant Sci.* 2014;5: 240. doi:10.3389/fpls.2014.00240
- 667 2. Angelovici R, Galili G, Fernie AR, Fait A. Seed desiccation: a bridge between maturation  
668 and germination. *Trends Plant Sci.* 2010;15: 211–218. doi:10.1016/j.tplants.2010.01.003
- 669 3. Rai VK. Role of Amino Acids in Plant Responses to Stresses. *Biol Plant.* 2002;45: 481–  
670 487. doi:10.1023/A:1022308229759
- 671 4. Araújo WL, Ishizaki K, Nunes-Nesi A, Larson TR, Tohge T, Krahnert I, et al. Identification  
672 of the 2-Hydroxyglutarate and Isovaleryl-CoA Dehydrogenases as Alternative Electron  
673 Donors Linking Lysine Catabolism to the Electron Transport Chain of Arabidopsis  
674 Mitochondria. *Plant Cell.* 2010;22: 1549–1563. doi:10.1105/tpc.110.075630
- 675 5. Angelovici R, Fait A, Fernie AR, Galili G. A seed high-lysine trait is negatively associated  
676 with the TCA cycle and slows down Arabidopsis seed germination. *New Phytol.* 2011;189:  
677 148–159. doi:10.1111/j.1469-8137.2010.03478.x
- 678 6. Amir R, Galili G, Cohen H. The metabolic roles of free amino acids during seed  
679 development. *Plant Sci.* 2018;275: 11–18. doi:10.1016/j.plantsci.2018.06.011
- 680 7. Hildebrandt TM, Nunes Nesi A, Araújo WL, Braun H-P. Amino Acid Catabolism in Plants.  
681 *Mol Plant.* 2015;8: 1563–1579. doi:10.1016/j.molp.2015.09.005
- 682 8. Huang T, Jander G. Abscisic acid-regulated protein degradation causes osmotic stress-  
683 induced accumulation of branched-chain amino acids in Arabidopsis thaliana. *Planta.*  
684 2017;246: 737–747. doi:10.1007/s00425-017-2727-3
- 685 9. Less H, Galili G. Principal Transcriptional Programs Regulating Plant Amino Acid  
686 Metabolism in Response to Abiotic Stresses. *Plant Physiol.* 2008;147: 316–330.  
687 doi:10.1104/pp.108.115733
- 688 10. Jander G, Joshi V. Recent progress in deciphering the biosynthesis of aspartate-derived

- 689 amino acids in plants. *Mol Plant*. 2010;3: 54–65. doi:10.1093/mp/ssp104
- 690 11. Barros JAS, Cavalcanti JHF, Medeiros DB, Nunes-Nesi A, Avin-Wittenberg T, Fernie AR,  
691 et al. Autophagy Deficiency Compromises Alternative Pathways of Respiration following  
692 Energy Deprivation in *Arabidopsis thaliana*. *Plant Physiol*. 2017;175: 62–76.  
693 doi:10.1104/pp.16.01576
- 694 12. Hildebrandt TM. Synthesis versus degradation: directions of amino acid metabolism during  
695 *Arabidopsis* abiotic stress response. *Plant Mol Biol*. 2018;98: 121–135.  
696 doi:10.1007/s11103-018-0767-0
- 697 13. Hirota T, Izumi M, Wada S, Makino A, Ishida H. Vacuolar Protein Degradation via  
698 Autophagy Provides Substrates to Amino Acid Catabolic Pathways as an Adaptive  
699 Response to Sugar Starvation in *Arabidopsis thaliana*. *Plant Cell Physiol*. 2018;59: 1363–  
700 1376. doi:10.1093/pcp/pcy005
- 701 14. Hayat S, Hayat Q, Alyemeni MN, Wani AS, Pichtel J, Ahmad A. Role of proline under  
702 changing environments: a review. *Plant Signal Behav*. 2012;7: 1456–1466.  
703 doi:10.4161/psb.21949
- 704 15. Szabados L, Savouré A. Proline: a multifunctional amino acid. *Trends Plant Sci*. 2010;15:  
705 89–97. doi:10.1016/j.tplants.2009.11.009
- 706 16. Chen Y-Z, Pang Q-Y, He Y, Zhu N, Branstrom I, Yan X-F, et al. Proteomics and  
707 metabolomics of *Arabidopsis* responses to perturbation of glucosinolate biosynthesis. *Mol*  
708 *Plant*. 2012;5: 1138–1150. doi:10.1093/mp/sss034
- 709 17. Osorio S, Vallarino JG, Szecowka M, Ufaz S, Tzin V, Angelovici R, et al. Alteration of the  
710 interconversion of pyruvate and malate in the plastid or cytosol of ripening tomato fruit  
711 invokes diverse consequences on sugar but similar effects on cellular organic acid,  
712 metabolism, and transitory starch accumulation. *Plant Physiol*. 2013;161: 628–643.  
713 doi:10.1104/pp.112.211094
- 714 18. Galili G, Avin-Wittenberg T, Angelovici R, Fernie AR. The role of photosynthesis and  
715 amino acid metabolism in the energy status during seed development. *Front Plant Sci*.

- 716 2014;5: 447. doi:10.3389/fpls.2014.00447
- 717 19. Muehlbauer GJ, Gengenbach BG, Somers DA, Donovan CM. Genetic and amino-acid  
718 analysis of two maize threonine-overproducing, lysine-insensitive aspartate kinase mutants.  
719 Theor Appl Genet. 1994;89: 767–774. doi:10.1007/BF00223717
- 720 20. Cohen H, Israeli H, Matityahu I, Amir R. Seed-specific expression of a feedback-insensitive  
721 form of CYSTATHIONINE- $\gamma$ -SYNTHASE in Arabidopsis stimulates metabolic and  
722 transcriptomic responses associated with desiccation stress. Plant Physiol. 2014;166: 1575–  
723 1592. doi:10.1104/pp.114.246058
- 724 21. Fait A, Angelovici R, Less H, Ohad I, Urbanczyk-Wochniak E, Fernie AR, et al.  
725 Arabidopsis seed development and germination is associated with temporally distinct  
726 metabolic switches. Plant Physiol. 2006;142: 839–854. doi:10.1104/pp.106.086694
- 727 22. Angelovici R, Lipka AE, Deason N, Gonzalez-Jorge S, Lin H, Cepela J, et al. Genome-  
728 Wide Analysis of Branched-Chain Amino Acid Levels in Arabidopsis Seeds. Plant Cell.  
729 2013;25: 4827–4843. doi:10.1105/tpc.113.119370
- 730 23. Angelovici R, Batushansky A, Deason N, Gonzalez-Jorge S, Gore MA, Fait A, et al.  
731 Network-guided GWAS improves identification of genes affecting free amino acids. Plant  
732 Physiol. 2016; doi:10.1104/pp.16.01287
- 733 24. Wang X, Larkins BA. Genetic Analysis of Amino Acid Accumulation in opaque-2 Maize  
734 Endosperm. Plant Physiol. 2001;125: 1766–1777. doi:10.1104/pp.125.4.1766
- 735 25. Schmidt MA, Barbazuk WB, Sandford M, May G, Song Z, Zhou W, et al. Silencing of  
736 soybean seed storage proteins results in a rebalanced protein composition preserving seed  
737 protein content without major collateral changes in the metabolome and transcriptome.  
738 Plant Physiol. 2011;156: 330–345. Available:  
739 <http://www.plantphysiol.org/content/156/1/330.short>
- 740 26. Galili G, Amir R. Fortifying plants with the essential amino acids lysine and methionine to  
741 improve nutritional quality [Internet]. Plant Biotechnology Journal. 2013. pp. 211–222.  
742 doi:10.1111/pbi.12025

- 743 27. Riedelsheimer C, Lisec J, Czedik-Eysenberg A, Sulpice R, Flis A, Grieder C, et al.  
744 Genome-wide association mapping of leaf metabolic profiles for dissecting complex traits  
745 in maize. *Proc Natl Acad Sci U S A*. 2012;109: 8872–8877. doi:10.1073/pnas.1120813109
- 746 28. Korte A, Farlow A. The advantages and limitations of trait analysis with GWAS: a review.  
747 *Plant Methods*. 2013;9: 29. doi:10.1186/1746-4811-9-29
- 748 29. Wu S, Alseekh S, Cuadros-Inostroza Á, Fusari CM, Mutwil M, Kooke R, et al. Combined  
749 Use of Genome-Wide Association Data and Correlation Networks Unravels Key Regulators  
750 of Primary Metabolism in *Arabidopsis thaliana*. *PLoS Genet*. 2016;12: e1006363.  
751 doi:10.1371/journal.pgen.1006363
- 752 30. Wentzell AM, Rowe HC, Hansen BG, Ticconi C, Halkier BA, Kliebenstein DJ. Linking  
753 metabolic QTLs with network and cis-eQTLs controlling biosynthetic pathways. *PLoS*  
754 *Genet*. 2007;3: 1687–1701. doi:10.1371/journal.pgen.0030162
- 755 31. Vallabhaneni R, Wurtzel ET. Timing and biosynthetic potential for carotenoid accumulation  
756 in genetically diverse germplasm of maize. *Plant Physiol*. 2009;150: 562–572.  
757 doi:10.1104/pp.109.137042
- 758 32. Wurtzel ET, Cuttriss A, Vallabhaneni R. Maize provitamin a carotenoids, current resources,  
759 and future metabolic engineering challenges. *Front Plant Sci*. 2012;3: 29.  
760 doi:10.3389/fpls.2012.00029
- 761 33. Gonzalez-Jorge S, Ha S-H, Magallanes-Lundback M, Gilliland LU, Zhou A, Lipka AE, et  
762 al. Carotenoid cleavage dioxygenase4 is a negative regulator of  $\beta$ -carotene content in  
763 *Arabidopsis* seeds. *Plant Cell*. 2013;25: 4812–4826. doi:10.1105/tpc.113.119677
- 764 34. Lipka AE, Gore MA, Magallanes-Lundback M, Mesberg A, Lin H, Tiede T, et al. Genome-  
765 wide association study and pathway-level analysis of tocochromanol levels in maize grain.  
766 *G3*. 2013;3: 1287–1299. doi:10.1534/g3.113.006148
- 767 35. Owens BF, Lipka AE, Magallanes-Lundback M, Tiede T, Diepenbrock CH, Kandianis CB,  
768 et al. A foundation for provitamin A biofortification of maize: genome-wide association and  
769 genomic prediction models of carotenoid levels. *Genetics*. 2014;198: 1699–1716.



- 770       doi:10.1534/genetics.114.169979
- 771   36. Harjes CE, Rocheford TR, Bai L, Brutnell TP, Kandianis CB, Sowinski SG, et al. Natural  
772       genetic variation in lycopene epsilon cyclase tapped for maize biofortification. *Science*.  
773       2008;319: 330–333. doi:10.1126/science.1150255
- 774   37. Meuwissen TH, Hayes BJ, Goddard ME. Prediction of total genetic value using genome-  
775       wide dense marker maps. *Genetics*. 2001;157: 1819–1829. Available:  
776       <https://www.ncbi.nlm.nih.gov/pubmed/11290733>
- 777   38. de Los Campos G, Hickey JM, Pong-Wong R, Daetwyler HD, Calus MPL. Whole-genome  
778       regression and prediction methods applied to plant and animal breeding. *Genetics*.  
779       2013;193: 327–345. doi:10.1534/genetics.112.143313
- 780   39. Goddard ME, Wray NR, Verbyla K, Visscher PM. Estimating Effects and Making  
781       Predictions from Genome-Wide Marker Data. *Stat Sci*. 2009;24: 517–529. doi:10.1214/09-  
782       STS306
- 783   40. Heffner EL, Sorrells ME, Jannink J-L. Genomic Selection for Crop Improvement. *Crop Sci*.  
784       2009;49: 1–12. doi:10.2135/cropsci2008.08.0512
- 785   41. Speed D, Balding DJ. MultiBLUP: improved SNP-based prediction for complex traits.  
786       *Genome Res*. 2014;24: 1550–1557. doi:10.1101/gr.169375.113
- 787   42. Edwards SM, Sørensen IF, Sarup P, Mackay TFC, Sørensen P. Genomic Prediction for  
788       Quantitative Traits Is Improved by Mapping Variants to Gene Ontology Categories in  
789       *Drosophila melanogaster*. *Genetics*. 2016;203: 1871–1883.  
790       doi:10.1534/genetics.116.187161
- 791   43. Edwards SM, Thomsen B, Madsen P, Sørensen P. Partitioning of genomic variance reveals  
792       biological pathways associated with udder health and milk production traits in dairy cattle.  
793       *Genet Sel Evol*. 2015;47: 60. doi:10.1186/s12711-015-0132-6
- 794   44. Sarup P, Jensen J, Ostersen T, Henryon M, Sørensen P. Increased prediction accuracy using  
795       a genomic feature model including prior information on quantitative trait locus regions in

- 796 purebred Danish Duroc pigs. *BMC Genet.* 2016;17: 11. doi:10.1186/s12863-015-0322-9
- 797 45. Fang L, Sahana G, Ma P, Su G, Yu Y, Zhang S, et al. Exploring the genetic architecture and  
798 improving genomic prediction accuracy for mastitis and milk production traits in dairy  
799 cattle by mapping variants to hepatic transcriptomic regions responsive to intra-mammary  
800 infection. *Genet Sel Evol.* 2017;49: 44. doi:10.1186/s12711-017-0319-0
- 801 46. MacLeod IM, Bowman PJ, Vander Jagt CJ, Haile-Mariam M, Kemper KE, Chamberlain  
802 AJ, et al. Exploiting biological priors and sequence variants enhances QTL discovery and  
803 genomic prediction of complex traits. *BMC Genomics.* 2016;17: 144. doi:10.1186/s12864-  
804 016-2443-6
- 805 47. Yang J, Manolio TA, Pasquale LR, Boerwinkle E, Caporaso N, Cunningham JM, et al.  
806 Genome partitioning of genetic variation for complex traits using common SNPs. *Nat*  
807 *Genet.* 2011;43: 519–525. doi:10.1038/ng.823
- 808 48. Speed D, Balding DJ. MultiBLUP: improved SNP-based prediction for complex traits.  
809 *Genome Res.* 2014;24: 1550–1557. doi:10.1101/gr.169375.113
- 810 49. Fang L, Sahana G, Ma P, Su G, Yu Y, Zhang S, et al. Use of biological priors enhances  
811 understanding of genetic architecture and genomic prediction of complex traits within and  
812 between dairy cattle breeds. *BMC Genomics.* 2017;18: 604. doi:10.1186/s12864-017-4004-  
813 z
- 814 50. Sørensen IF, Edwards SM, Rohde PD, Sørensen P. Multiple Trait Covariance Association  
815 Test Identifies Gene Ontology Categories Associated with Chill Coma Recovery Time in  
816 *Drosophila melanogaster*. *Sci Rep.* 2017;7: 2413. doi:10.1038/s41598-017-02281-3
- 817 51. Li X, Zhu C, Yeh C-T, Wu W, Takacs EM, Petsch KA, et al. Genic and nongenic  
818 contributions to natural variation of quantitative traits in maize. *Genome Res.* 2012;22:  
819 2436–2444. doi:10.1101/gr.140277.112
- 820 52. Lango Allen H, Estrada K, Lettre G, Berndt SI, Weedon MN, Rivadeneira F, et al.  
821 Hundreds of variants clustered in genomic loci and biological pathways affect human  
822 height. *Nature.* 2010;467: 832–838. doi:10.1038/nature09410

- 823 53. Lipka AE, Kandianis CB, Hudson ME, Yu J, Drnevich J, Bradbury PJ, et al. From  
824 association to prediction: statistical methods for the dissection and selection of complex  
825 traits in plants. *Curr Opin Plant Biol.* 2015;24: 110–118. doi:10.1016/j.pbi.2015.02.010
- 826 54. Gu L, Jones AD, Last RL. Broad connections in the Arabidopsis seed metabolic network  
827 revealed by metabolite profiling of an amino acid catabolism mutant. *Plant J.* 2010;61: 579–  
828 590. doi:10.1111/j.1365-313X.2009.04083.x
- 829 55. Toubiana D, Batushansky A, Tzfadia O, Scossa F, Khan A, Barak S, et al. Combined  
830 correlation-based network and mQTL analyses efficiently identified loci for branched-chain  
831 amino acid, serine to threonine, and proline metabolism in tomato seeds. *Plant J.* 2015;81:  
832 121–133. Available: <https://onlinelibrary.wiley.com/doi/abs/10.1111/tpj.12717>
- 833 56. Skiryecz A, Vandenbroucke K, Clauw P, Maleux K, De Meyer B, Dhondt S, et al. Survival  
834 and growth of Arabidopsis plants given limited water are not equal. *Nat Biotechnol.*  
835 2011;29: 212–214. doi:10.1038/nbt.1800
- 836 57. Skiryecz A, De Bodt S, Obata T, De Clercq I, Claeys H, De Rycke R, et al. Developmental  
837 stage specificity and the role of mitochondrial metabolism in the response of Arabidopsis  
838 leaves to prolonged mild osmotic stress. *Plant Physiol.* 2010;152: 226–244.  
839 doi:10.1104/pp.109.148965
- 840 58. Daetwyler HD, Calus MPL, Pong-Wong R, de Los Campos G, Hickey JM. Genomic  
841 prediction in animals and plants: simulation of data, validation, reporting, and  
842 benchmarking. *Genetics.* 2013;193: 347–365. doi:10.1534/genetics.112.147983
- 843 59. Wolc A, Kranis A, Arango J, Settar P, Fulton JE, O’Sullivan NP, et al. Implementation of  
844 genomic selection in the poultry industry. *Animal Frontiers.* 2016;6: 23–31. Available:  
845 <https://pdfs.semanticscholar.org/c7c9/899b866d8814fe32ae46c8a50dfdbe68edc7.pdf>
- 846 60. Nielsen NH, Jahoor A, Jensen JD, Orabi J, Cericola F, Edriss V, et al. Genomic Prediction  
847 of Seed Quality Traits Using Advanced Barley Breeding Lines. *PLoS One.* 2016;11:  
848 e0164494. doi:10.1371/journal.pone.0164494
- 849 61. Weller JI, Ezra E, Ron M. Invited review: A perspective on the future of genomic selection

- 850 in dairy cattle. *J Dairy Sci.* 2017;100: 8633–8644. doi:10.3168/jds.2017-12879
- 851 62. Lozano R, del Carpio DP, Amuge T, Kayondo IS, Adebo AO, Ferguson M, et al.  
852 Leveraging Transcriptomics Data for Genomic Prediction Models in Cassava [Internet].  
853 bioRxiv. 2017. p. 208181. doi:10.1101/208181
- 854 63. Nordborg M, Hu TT, Ishino Y, Jhaveri J, Toomajian C, Zheng H, et al. The pattern of  
855 polymorphism in *Arabidopsis thaliana*. *PLoS Biol.* 2005;3: e196.  
856 doi:10.1371/journal.pbio.0030196
- 857 64. Binder S. Branched-Chain Amino Acid Metabolism in *Arabidopsis thaliana*. *Arabidopsis*  
858 *Book.* 2010;8: e0137. doi:10.1199/tab.0137
- 859 65. Tzin V, Galili G. New insights into the shikimate and aromatic amino acids biosynthesis  
860 pathways in plants. *Mol Plant.* 2010;3: 956–972. doi:10.1093/mp/ssq048
- 861 66. Maeda H, Dudareva N. The shikimate pathway and aromatic amino Acid biosynthesis in  
862 plants. *Annu Rev Plant Biol.* 2012;63: 73–105. doi:10.1146/annurev-arplant-042811-  
863 105439
- 864 67. Ogo Y, Mori T, Nakabayashi R, Saito K, Takaiwa F. Transgenic rice seed expressing  
865 flavonoid biosynthetic genes accumulate glycosylated and/or acylated flavonoids in protein  
866 bodies. *J Exp Bot.* 2016;67: 95–106. doi:10.1093/jxb/erv429
- 867 68. Mikkelsen MD, Naur P, Halkier BA. *Arabidopsis* mutants in the C--S lyase of glucosinolate  
868 biosynthesis establish a critical role for indole-3-acetaldoxime in auxin homeostasis. *Plant J.*  
869 2004;37: 770–777. Available: [https://onlinelibrary.wiley.com/doi/abs/10.1111/j.1365-](https://onlinelibrary.wiley.com/doi/abs/10.1111/j.1365-313X.2004.02002.x)  
870 [313X.2004.02002.x](https://onlinelibrary.wiley.com/doi/abs/10.1111/j.1365-313X.2004.02002.x)
- 871 69. Kliebenstein DJ, D’Auria JC, Behere AS, Kim JH, Gunderson KL, Breen JN, et al.  
872 Characterization of seed-specific benzoyloxyglucosinolate mutations in *Arabidopsis*  
873 *thaliana*. *Plant J.* 2007;51: 1062–1076. Available:  
874 <https://onlinelibrary.wiley.com/doi/abs/10.1111/j.1365-313X.2007.03205.x>
- 875 70. Xiang X, Wu Y, Planta J, Messing J, Leustek T. Overexpression of serine acetyltransferase

- 876 in maize leaves increases seed-specific methionine-rich zeins. *Plant Biotechnol J.* 2018;16:  
877 1057–1067. doi:10.1111/pbi.12851
- 878 71. Forde BG, Lea PJ. Glutamate in plants: metabolism, regulation, and signalling. *J Exp Bot.*  
879 2007;58: 2339–2358. doi:10.1093/jxb/erm121
- 880 72. Ma H, Wang S. Histidine Regulates Seed Oil Deposition through Abscisic Acid  
881 Biosynthesis and  $\beta$ -Oxidation. *Plant Physiol.* 2016;172: 848–857. doi:10.1104/pp.16.00950
- 882 73. Ingle RA. Histidine biosynthesis. *Arabidopsis Book.* 2011;9: e0141. doi:10.1199/tab.0141
- 883 74. Stepansky A, Leustek T. Histidine biosynthesis in plants. *Amino Acids.* 2006;30: 127–142.  
884 doi:10.1007/s00726-005-0247-0
- 885 75. Platt A, Horton M, Huang YS, Li Y, Anastasio AE, Mulyati NW, et al. The scale of  
886 population structure in *Arabidopsis thaliana*. *PLoS Genet.* 2010;6: e1000843.  
887 doi:10.1371/journal.pgen.1000843
- 888 76. Sauer U, Lasko DR, Fiaux J, Hochuli M, Glaser R, Szyperski T, et al. Metabolic flux ratio  
889 analysis of genetic and environmental modulations of *Escherichia coli* central carbon  
890 metabolism. *J Bacteriol.* 1999;181: 6679–6688. Available:  
891 <https://www.ncbi.nlm.nih.gov/pubmed/10542169>
- 892 77. Weckwerth W, Loureiro ME, Wenzel K, Fiehn O. Differential metabolic networks unravel  
893 the effects of silent plant phenotypes. *Proc Natl Acad Sci U S A.* 2004;101: 7809–7814.  
894 doi:10.1073/pnas.0303415101
- 895 78. Kutner MH, Nachtsheim CJ, Dr. JN. *Applied Linear Regression Models- 4th Edition with*  
896 *Student CD (McGraw Hill/Irwin Series: Operations and Decision Sciences) [Internet]. 4*  
897 *edition. McGraw-Hill Education; 2004. Available: [https://www.amazon.com/Applied-](https://www.amazon.com/Applied-Linear-Regression-Models-Student/dp/0073014664)*  
898 *Linear-Regression-Models-Student/dp/0073014664*
- 899 79. Box GEP, Cox DR. An analysis of transformations. *J R Stat Soc.* 1964; Available:  
900 <https://rss.onlinelibrary.wiley.com/doi/abs/10.1111/j.2517-6161.1964.tb00553.x>

- 901 80. Atwell S, Huang YS, Vilhjálmsón BJ, Willems G, Horton M, Li Y, et al. Genome-wide  
902 association study of 107 phenotypes in *Arabidopsis thaliana* inbred lines. *Nature*. 2010;465:  
903 627–631. doi:10.1038/nature08800
- 904 81. Lipka AE, Lu F, Cherney JH, Buckler ES, Casler MD, Costich DE. Accelerating the  
905 switchgrass (*Panicum virgatum* L.) breeding cycle using genomic selection approaches.  
906 *PLoS One*. 2014;9:e112227.
- 907 82. Thimm O, Bläsing O, Gibon Y, Nagel A, Meyer S, Krüger P, et al. MAPMAN: a user-  
908 driven tool to display genomics data sets onto diagrams of metabolic pathways and other  
909 biological processes. *Plant J*. 2004;37: 914–939. Available:  
910 <https://www.ncbi.nlm.nih.gov/pubmed/14996223>
- 911 83. Berardini TZ, Reiser L, Li D, Mezheritsky Y, Muller R, Strait E, et al. The *Arabidopsis*  
912 information resource: Making and mining the “gold standard” annotated reference plant  
913 genome. *Genesis*. 2015;53: 474–485. doi:10.1002/dvg.22877
- 914 84. Durinck S, Moreau Y, Kasprzyk A, Davis S, De Moor B, Brazma A, et al. BioMart and  
915 Bioconductor: a powerful link between biological databases and microarray data analysis.  
916 *Bioinformatics*. 2005;21: 3439–3440. doi:10.1093/bioinformatics/bti525
- 917 85. Durinck S, Spellman PT, Birney E, Huber W. Mapping identifiers for the integration of  
918 genomic datasets with the R/Bioconductor package biomaRt. *Nat Protoc*. 2009;4.  
919 doi:10.1038/nprot.2009.97
- 920 86. R Core Team. R: A language and environment for statistical computing [Internet]. R  
921 Foundation for Statistical Computing, Vienna, Austria; 2016. Available: [http://www.R-](http://www.R-project.org/)  
922 [project.org/](http://www.R-project.org/)
- 923 87. Zhan S, Horrocks J, Lukens LN. Islands of co-expressed neighbouring genes in *Arabidopsis*  
924 *thaliana* suggest higher-order chromosome domains. *Plant J*. 2006;45: 347–357.  
925 doi:10.1111/j.1365-313X.2005.02619.x
- 926 88. Speed D, Hemani G, Johnson MR, Balding DJ. Improved heritability estimation from  
927 genome-wide SNPs. *Am J Hum Genet*. 2012;91: 1011–1021.

- 928           doi:10.1016/j.ajhg.2012.10.010
- 929   89. VanRaden PM. Efficient methods to compute genomic predictions. *J Dairy Sci.* 2008;91:  
930       4414–4423. doi:10.3168/jds.2007-0980
- 931   90. Astle W, Balding DJ. Population Structure and Cryptic Relatedness in Genetic Association  
932       Studies. *Stat Sci.* 2009;24: 451–471. doi:10.1214/09-STS307
- 933   91. Whittaker JC, Thompson R, Denham MC. Marker-assisted selection using ridge regression.  
934       *Genet Res.* 2000;75: 249–252. doi:10.1017/s0016672399004462
- 935   92. Speed D, Cai N, UCLEB Consortium, Johnson MR, Nejentsev S, Balding DJ. Reevaluation  
936       of SNP heritability in complex human traits. *Nat Genet.* 2017;49: 986–992.  
937       doi:10.1038/ng.3865
- 938   93. Rincent R, Laloë D, Nicolas S, Altmann T, Brunel D, Revilla P, et al. Maximizing the  
939       reliability of genomic selection by optimizing the calibration set of reference individuals:  
940       comparison of methods in two diverse groups of maize inbreds (*Zea mays* L.). *Genetics.*  
941       2012;192: 715–728. doi:10.1534/genetics.112.141473
- 942   94. Benjamini Y, Hochberg Y. Controlling the False Discovery Rate: A Practical and Powerful  
943       Approach to Multiple Testing. *J R Stat Soc Series B Stat Methodol.* 1995;57: 289–300.  
944       Available: <http://www.jstor.org/stable/2346101>
